1    **How human intervention and climate change shaped the fate**  
2    **of the Northern Bald Ibis from ancient Egypt to the presence:**  
3    **an interdisciplinary approach to extinction and recovery of an**  
4    **iconic bird species**

5

6    Johannes Fritz<sup>1,2\*</sup>, Jiří Janák<sup>3</sup>

7    1 Waldrappteam Conservation & Research, Mittersheim, Austria

8    2 Department of Behavioral and Cognitive Biology, University of Vienna, Austria

9    3 Czech Institute of Egyptology, Charles University, Prague, Czech Republic

10

11    \*Corresponding author

12    E-mail: [jfritz@waldrapp.eu](mailto:jfritz@waldrapp.eu) (JF)

13

14    Both authors contributed equally to this work.

15

16    **Abstract**

17    Once widespread around the Mediterranean, the Northern Bald Ibis (*Geronticus eremita*) became one

18    of the rarest birds in the world. We trace the history of this species through different epochs to the

19    present. A particular focus is on its life and disappearance in ancient Egypt, where it attained the

20    greatest mythological significance as a hieroglyphic sign for 'blessed ancestor spirits', and on modern

21    endeavours to rewild and restore the species. The close association of the Northern Bald Ibis with

22    human culture in ancient Egypt, as in other regions, is caused by primarily two reasons, the

23    characteristic appearance and behaviour, as well as the need for open foraging areas. In consequence,

24 a mutualistic relationship between humans and birds was formed in some cultures. The benefit for the  
25 Northern Bald Ibis was mainly the availability of feeding habitats, which were cleared by humans for  
26 farming or grazing and might have contributed to the spread of the species. The benefit to people was  
27 primarily cultural and mythological, whereby the bird was worshiped in ancient Egypt and in Muslim  
28 cultures, while Christian cultures in Europe rather regarded it as bad omen or nuisance, like any black  
29 bird species. Another benefit was profane in nature, the species was also hunted for food, mainly in  
30 Europe. But alike many other species, proximity to humans also carried a high risk for the Northern  
31 Bald Ibis. We discuss various kinds of human impacts that were driving causes for the extinction of the  
32 species in almost all regions. However, the historical disappearance of populations also correlates  
33 markedly with changes in climate, especially in ancient Egypt and the Middle Ages. This fact has  
34 important implications for current conservation efforts, especially since international action plans for  
35 the Northern Bald Ibis have taken little account of climate change effects so far. The Northern Bald Ibis  
36 is an outstanding example of how an interdisciplinary cultural-historical and natural-scientific  
37 approach significantly promotes the interpretation of historical evidence as well as the  
38 implementation of current rewilding and restoration efforts.

## 39 **Keywords**

40 Northern Bald Ibis, *Geronticus eremita*, interdisciplinary approach, Egyptology, akh, religious changes,  
41 climate change, restoration, translocation, migration

## 42 **Introduction**

43 There is a growing consensus that the rapidly increasing challenges of biodiversity conservation and  
44 restoration cannot be overcome without a thorough knowledge of human society and its history (1). In  
45 an interdisciplinary approach social science can promote the sustainability and effectiveness of  
46 conservation measures, if certain obstacles can be overcome, like suitable platforms for  
47 interdisciplinary publications or misunderstandings due to different perspectives or definitions (2). On

48 the other hand side, cooperation with natural scientists can also drive research in the social sciences,  
49 such as the interpretation of historical events and depictions (3).

50 The Northern Bald Ibis (*Geronticus eremita*) combines current conservation needs and cultural-  
51 historical research questions in an extraordinary way. It is among the most threatened bird species in  
52 the world, listed on the IUCN Red List as *critically endangered* for 24 year, before it was downgraded  
53 to *endangered* in 2018 due to extensive protection efforts (4). The unique appearance, conspicuous  
54 behaviour and diverse flight characteristics made this migratory bird species a noticeable creature on  
55 the ground and in the air. Moreover, humans created habitats for this species when they cultivated  
56 cropland and meadows in different regions and epochs. That inevitably made him a species whose  
57 history and fate were closely interwoven with that of the human cultures with which he interacted  
58 and shared the habitats (5–7).

59 An epoch with particularly rich historical traces of the Northern Bald Ibis was the ancient Egypt (8). A  
60 depiction of this species was used in Egyptian scripts as the *akh-sigh*, which is easily recognizable  
61 characteristic shape of the bird's body, with the long-curved bill and most characteristic the typical  
62 crest covering the back. As a hieroglyphic sign for 'blessed ancestor spirits' it attained the greatest  
63 mythological significance. However, there are no attestations of keeping, hunting or sacrificing or  
64 mummifying the Northern Bald Ibis, as it was the case with the Sacred Ibis (*Threskiornis aethiopicus*) or  
65 the Glossy Ibis (*Plegadis falcinellus*).

66 In this article we aim to shed light on the peculiarities in the historic context and the circumstance of  
67 extinction of the species in the ancient Egypt and in other periods and regions, using current  
68 knowledge on the biology of this species. We also want to draw conclusions from this that are relevant  
69 to the current and urgently needed conservation measures for the species.

## 70 **Material and Methods**

71 Studies on Northern Bald Ibis behaviour were mainly be done in the frame of the European LIFE+  
72 reintroduction project (LIFE+12-BIO\_AT\_000143; [www.waldrapp.eu](http://www.waldrapp.eu)). This project aims to establish a

73 migratory population in Central Europe with a migration tradition to the southern Tuscany. A steadily  
74 increasing number of wild living birds migrate between the common wintering site and three breeding  
75 sites north of the Alps. Release in course of this project is done in accordance with the IUCN  
76 Reintroduction Guidelines and is approved by the regarding national authorities.

77 Studies on the Egyptian concept of the *akh* (represented in hieroglyphic script by a depiction of the  
78 Northern Bald Ibis) have been undertaken for more than 10 years within several broader research  
79 projects of the Czech Institute of Egyptology, Charles University, Prague. Methodologically, this  
80 research covered archaeological excavation, analysis and interpretation of material, textual and  
81 iconographical evidence, analysis of all available original textual sources dealing with the ancient  
82 Egyptian religious concept of the *akh*, collecting (and interpreting) evidence on bodily remains of the  
83 Northern Bald Ibis from Egypt and, most importantly, building a palaeographic database of the *akh*  
84 depictions from all historic periods of ancient Egypt. Thus, we were able to gain different kinds of data  
85 (material, as well as pictorial and textual) on the presence and absence of the Northern Bald Ibis in  
86 ancient Egypt.

## 87 Results

### 88 The Northern Bald Ibis

89 Once a widespread colonial migratory bird species, the Northern Bald Ibis (*Geronticus eremita*; Fig 1)  
90 had to be put on the Red List in 1994 as one of the rarest birds in the world. At that time, only one  
91 population remained in the wild, living at the Atlantic coast in Morocco. But also this population was at  
92 a critical population size with only 65 breeding pairs (9). They were the remainders of a once  
93 widespread species with breeding colonies on the African continent from Morocco to Egypt, in large  
94 parts of Europe and on the Arabian Peninsula (10).

95 **Fig 1. Portrait of an adult Northern Bald Ibis.** Picture J Fritz.

96 The Europe, the species went extinct already in the Middle Age. From the publications of the Swiss  
97 naturalist Conrad Gesner (11) and other sources we are able to reconstruct historic breeding sites  
98 mainly along the northern foothills of the Alps (12–14). But there is also increasing evidence for a  
99 larger former breeding range in Europe, with indications for southern Spain (15), the Upper Adriatic  
100 Region (16), Bulgaria (17) or the *Kaiserstuhl* region in Baden-Württemberg with bones dating to the 4<sup>th</sup>  
101 century AD (18). Northern Bald Ibis bones found in a cave located in the French department of  
102 Ardèche even dated to the Iron Age, between 764 and 406 BC (19).

103 The historic evidence for a long-lasting presence of the Northern Bald Ibis in Europe throughout the  
104 Holocene corresponds with recent genetic findings. In an extensive analysis of mitochondrial DNA,  
105 Wirtz et al. (2018) found no genetic differentiation between the Moroccan population and the former  
106 Middle East population. This indicates a contiguous Northern Bald Ibis population whose breeding  
107 range covered large parts of North Africa, Europe and the Middle East.

108 The separation into a western and eastern populations took place when the species disappeared from  
109 Europe in the early 17<sup>th</sup> century. Historic record clearly indicated anthropogenic causes, mainly  
110 hunting and collection of chicks (21). But the rapid decline in Europe was probably accelerated by the  
111 Little Ice Age, as it is also evident for other species (22). The period from the beginning of the  
112 worldwide glacial expansion in 1550 till the first climatic minimum in 1650 fits very well with the  
113 decline of the Northern Bald Ibis population. The deteriorating climatic condition may have led to  
114 reduced breeding success and increased loss rate due to onset of winter (16,23).

115 After vanishing in Europe, the cultural memory of the species was lost for centuries and historic  
116 depictions were taken for portraits of a mythical creature. It was not until 1897 that ornithologists  
117 recognized that the depictions resemble a real living species which was described for the Middle East  
118 and only then did the species receive its current scientific name *Geronticus eremita* (13).

119 At the time when the species disappeared in Europe, it was still widespread in the Middle East with  
120 some colonies holding several thousand individuals (24). However, till end of the 20<sup>th</sup> century all these

121 colonies became exterminated. Major causes were destruction of the habitat, disturbance of the  
122 breeding colonies and the industrialization of agriculture. A well-documented example is the former  
123 colony along the river Euphrates, near the town of Bireçik in southern Turkey. There, the intensive  
124 application of DDT against malaria and locusts caused the loss of more than 600 individuals, about  
125 70% of the population, between 1959 and 1960 (25,26). In 1989, from three remaining adult birds,  
126 which returned from migration to this breeding site, only one bird survived to the end of the breeding  
127 season.

128 This was generally assumed to be the end of the last wild colony in the Middle East (27). But in fact, it  
129 was not. Very unexpectedly, a small relict population was discovered in 2002 near Palmyra in Syria,  
130 comprising of only seven individuals (28). Satellite tracking revealed that they still migrate over more  
131 than 3000 km to the historic wintering site near Addis Ababa in Ethiopia (29). The same birds which  
132 behaved very shy at their breeding site in the Syrian desert lived during winter in an agro-pastoral  
133 landscape in the close surrounding of villages in Ethiopia (30).

134 After the surprising discovery of this relic population, extensive international conservation efforts  
135 followed. They even included the release of three juveniles from a semi-captive breeding colony in  
136 Bireçik, Turkey, in 2010 (31). However, in the end all efforts were in vain. The last bird disappeared in  
137 2013 and with it also the last historic migration tradition (32). This event also marks the general  
138 extinction of the Northern Bald Ibis in its characteristic lifestyle as a migratory species. There is no  
139 longer any evidence that a migrating population still exists anywhere in the former distribution area.

140 What remains after vanishing of a species are cultural traces and these can be found throughout the  
141 entire historic area of this extraordinary bird. But the richest and most exciting traces are from ancient  
142 Egypt.

## 143 **The Akh**

144 In ancient Egypt, the image of the Northern Bald Ibis was inseparably linked with the notion of *akh*,  
145 often translated as blessed dead or effective spirit (33–38), pointed toward many different meanings,

146 such as the efficient blessed dead or living people who acted effectively for or on behalf of their  
147 masters (39). The *akh* belonged to cardinal terms of ancient Egyptian religion – almost as important as  
148 terms saint or angel in Christianity! – and hence it can be often found in Egyptian religious texts, as  
149 well as in other textual and iconographic sources.

150 Its basic meaning related to effectiveness and reciprocal relationship that crossed the borderlines  
151 between different cosmic spheres (38). The Egyptians considered their blessed, efficient and  
152 influential dead (the *akhu*) ‘living’ or ‘transfigured’, but a deceased human being had to be admitted  
153 and elevated into this new state. The dead became *akhu* only after mummification and proper burial  
154 rites were performed on them and after they had passed through obstacles of death and the trials of  
155 the underworld. The positive status of the mighty and transfigured *akhu* was mirrored by a negative  
156 concept of the *mutu* who represented those who remained dead, i.e. the damned.

157 A very important role in the process of becoming an *akh* was reserved for the horizon (*akhet*).  
158 Although it mainly represented the junction of cosmic realms (the earth, the sky and the netherworld),  
159 the horizon was a region in itself (40), and it was believed to be the place of sunrise, resurrection and  
160 a region where divine beings dwelled and where they interacted with the world of the living (33,41–  
161 44).

162 When a dead person’s journey to the afterlife had successfully finished and he/she was justified and  
163 transfigured into an *akh*, the person thus became a mighty and mysterious entity, which participated  
164 on the divine sphere of existence and yet still had some influence upon the world of the living. The  
165 *akhu* guarded their tombs where they promised to punish intruders on the one hand, and be  
166 inclinable to help those who presented them with offerings on the other (45), and acted as mediators  
167 who could intercede on behalf of the living with the gods or other *akhu* (37). Although the *akhu* had  
168 reached the afterlife existence, they still needed the living, since it was the latter who performed  
169 rituals, carried out the embalming and funerary requirements, and provided their dead ancestors with

170 offerings (33). The *akhu* and the living represented co-dependent communities, and their mutual  
171 relationships and cooperation formed one of the pillars of ancient Egyptian religion (33).

## 172 **Appearance of the Northern Bald Ibis**

173 The Northern Bald Ibis is an exotic appearance with a long curved bill, a naked reddish face, framed by  
174 an imposing crest of black lancet feathers, and an all-black plumage that gleams metallic in the  
175 sunlight (Fig 1). The Latin name reflects the characteristic appearance: *Geronticus eremita*, the old  
176 hermit. Systematically, the Northern Bald Ibis belongs to the order Pelecaniformes and the family  
177 Threskiornithidae. The genus *Geronticus* includes only further species, the Southern Bald Ibis (*G.*  
178 *calvus*) native to South Africa.

179 The sexes do not differ significantly. The males are slightly heavier than the females (mean weight m:  
180 1390g, f:1257g; (10), with a longer and stronger beak. But the distributions of characteristics overlap,  
181 and a reliable determination of the sexes is only possible with genetic methods. The juveniles, on the  
182 other hand, are clearly distinguishable by their grey-feathered head.

183 Most historic Northern Bald Ibis drawing represent adult birds with the bare head and the feather  
184 crest (6,13,46). But there are some noticeable exceptions. A drawing by Conrad Gessner (11) shows a  
185 juvenile bird with a small crest and completely feathered head. Even more clearly is an altarpiece from  
186 the fifteenth century from around Munich, Germany, which represents the Mount of Olives scene,  
187 with Jesus and the disciples in prayerful attitudes. A detailed juvenile Northern Bald Ibis is shown at  
188 the edge of this picture, even with a worm in its bill as characteristic food. Such detailed  
189 representations indicate that the artists knew the birds themselves, what is an important indication  
190 for the presence of the species in these times.

191 The Bald Ibis in the altar scene is interpreted as a representation of death and the hereafter (4,13).  
192 Christian cultures in Europe regarded black birds in general rather as bad omen or nuisance (16). But  
193 the rather negative mythological image probably did less harm to the species than its reputation as a  
194 tasty food bird. Gesner (11) reported that the Northern Bald Ibis was praised as food and considered a



195 treat because of the lovely flesh and soft bones. They were caught, shot and pre-fledged juveniles  
196 were taken from the nest (21).

197 The importance for the dining tables of the nobility and the clergy even led to protective measures as  
198 the populations declined. In Salzburg, for example, archbishop decrees of 1504 and 1584 criminalized  
199 shooting of Northern Bald Ibises in the wall of the *Mönchsberg* above the city of Salzburg. In the same  
200 century, Emperor Maximilian I in Graz provided artificial nesting aids in the rock walls. In the same  
201 period, an order was issued in the city of Graz in Austria, where also a colony occurred, that Northern  
202 Bald Ibises should not be shot, but rather cherished, controlled and guarded (24,47). Even these  
203 measures could not prevent extinction, but at least the last evidence for Bald Ibis occurrence in  
204 Europe comes from Graz in 1621 (21).

205 In the Muslim world the Bald Ibis had a better and more significant mythological image than in the  
206 Christian world and they were less pursued as edible birds. In Muslim tradition, the birds were  
207 worshiped because it was a Bald Ibis who led Noah and his family to the fertile lowlands on the  
208 Euphrates after landing on Mount Ararat (7). In Bireçik they also honoured these birds as leaders of  
209 the *hajj*, because they flew southward in fall in large numbers, just like pilgrims to Mecca, and they  
210 returned in spring after a period common for pilgrims (4,24). For that reason, the people of Bireçik  
211 used to celebrate the return of the birds in February with a traditional *Kelaynak* festival (*kelaynak* is  
212 the Turkish name for the species).

## 213 **Akh in material, textual and pictorial evidence**

214 Ancient Egyptians used a pictorial representation of the Northern Bald Ibis for the hieroglyphic sign  
215 '*akh*' (Fig 2). The sign, like its living model, is easily recognizable by the shape of its body, posture,  
216 shorter legs, long curved bill and a typical crest covering the back of the head. Although there are  
217 many aspects of this bird's nature that must have had impact on the mind of the Egyptians, the main  
218 factor in holding the bird in particular esteem and relating it to concept of the *akh* was probably the  
219 bird's habitat (see below).

220 **Fig 2. The hieroglyphic *akh*-sign from the tomb of Akhethotep.** Drawing by Lucie Vařeková.

221 The only attested piece of material evidence for the Northern Bald Ibis in Egypt in the form of skeletal  
222 remains comes from Maadi region (48) located south of modern Cairo where the so-called Maadi  
223 culture had its settlements around 4000 – 3400 BC. This unique find represents both the earliest  
224 evidence for the presence of the bird in Egypt and its only confirmed preserved bodily remains.

225 Pictorial representations of the Northern Bald Ibis have been recorded only from later periods of  
226 Egyptian history. The earliest Egyptian example of the bird's depiction is attested on the so-called Ibis  
227 slate palette dated to the Naqada III Period (circa 3300 – 3000 BC), other early examples date to the  
228 Late Predynastic and Early Dynastic Periods (c. 3000 – 2700 BC).

229 From the Old Kingdom (c. 2700 – 2180 BC) onwards, a pictorial representation of the Northern Bald  
230 Ibis was used as a hieroglyphic sign for the word-root *akh* linked with the notion of effective power  
231 and the blessed dead. Some of the Old Kingdom depictions of the bird (e.g. from the tombs of  
232 Hetepherakhti, Akhethotep, Ptahhotep II or Ankhmahor) show very high accuracy revealing precise  
233 observations of ancient scribes and artists. On the other hand, depictions of this ibis attested in later  
234 tombs, e.g. the one of Hesuwer and Khnumhotep II dated to the Middle Kingdom (c. 2130 – 1770) are  
235 not as detailed as earlier examples. In Khnumhotep's case, the Northern Bald Ibis is represented in a  
236 surprisingly incorrect manner (Fig 3), although other bird depictions attested in the tomb show unique  
237 accuracy and detail (8,49). The Northern Bald Ibis also appears on several Old Kingdom diadems found  
238 only in funerary context. These objects are equipped with additional discs composed of two opposed  
239 papyrus umbels with a Northern Bald Ibis on each of the blossoms. In some cases, an *ankh* (the sign of  
240 life) appears between the birds (50,51). The funerary context suggests that the diadems probably  
241 meant to ensure the reaching of afterlife and the ibis (as the *akh* sign/symbol) points towards the idea  
242 of transfiguration and resurrection (39).

243 **Fig 3. The hieroglyphic *akh*-sign from the tomb of Khnumhotep.** Drawing by Lucie Vařeková.

244 From the time of the New Kingdom (c. 1550 – 1070 BC) and the following periods of Egyptian history  
245 artistic representations of the Northern Bald Ibis are almost completely missing with two exceptions.  
246 The first is represented by the sign of *akh* that has kept its form (a rather stylized depiction of the  
247 Northern Bald Ibis) until the very end of ancient Egyptian history and the demise of hieroglyphic script.  
248 The latter deals with a mysterious ritual, called the *Vogellauf* in Egyptology. The ritual is attested  
249 among royal cultic scenes depicted mainly on temple walls from mid-New Kingdom until the Roman  
250 period (3,52,53) and which was most probably associated with another two still partly enigmatic  
251 rituals, called the *Rudderlauf* and the *Vasenlauf* (52). The representations of the ritual show the king  
252 running towards a deity with a Northern Bald Ibis in his one hand and three rods or sceptres of life,  
253 stability, and power in the other (Fig 4). The scene does not refer pictorially or textually to the ibis as  
254 to an offering or a sacrifice and the bird's representation leaves us to conclude that it was neither  
255 dead nor alive. Hence, the suggested interpretation is that the image of the Northern Bald Ibis does  
256 not refer to the bird in its self but rather represents again the *akh*-sign in a symbolic reference to the  
257 king's effective *akh*-power and mutual *akh*-relationship between the king and the deity (3). The loss of  
258 accuracy and the lack of evidence was very probably linked with the disappearance of the species  
259 from Egypt during the final phase of the third millennium BC (see below).

260 **Fig 4. Egyptian king during the so-called *Vogellauf* ritual.** Drawing by Lucie Vařeková.

## 261 Northern Bald Ibis habitats

262 A remarkable characteristic of the Northern Bald Ibis is the long and fragile curved bill. It is poorly  
263 suited to hunt for mobile prey but perfectly shaped to dig for invertebrates deeply into the soil. Thus,  
264 the Northern Bald Ibis is mainly a tactile hunter. Favourable habitats are open landscapes with low  
265 vegetation and a high abundancy of the soil fauna. Under favourable conditions, the diet of the specie  
266 predominantly consists of worms and larva (54,55). But Bald Ibises show a high flexibility in their  
267 feeding habits. For example, in the Syrian desert birds were found to feed mainly on tadpoles which  
268 they pick up from the beach out of man-made reservoirs (56), while the same individuals at the

269 wintering site predominantly dig for worms and larvae at freshly cut hayfields (57). For the remaining  
270 population in Morocco, lizards were found to represent an essential part of the diet (58).

271 The flexibility in foraging is also reflected in the diversity of foraging habitats. Northern Bald Ibises  
272 used to feed in the Syrian desert (59), in the Moroccan steppe (58,60), on meadows and pastures of  
273 the northern foothills of the Alps (54,55) or the Ethiopian highlands (57) and even on Turkish mint  
274 fields (61). Feeding habitats have in common that they are rather open landscapes with at least a loose  
275 vegetation coverage. The birds show a clear preference for low vegetation, usually not higher than 10  
276 cm. This can be a natural characteristic of the vegetation, especially in semi-arid areas, but in most  
277 regions the birds benefit from grazing or mowing (55,60). Moreover, the Northern Bald Ibis is generally  
278 not a bird of wetlands, as many other ibis species, but it needs an available freshwater source for  
279 drinking and bathing. This became evident in Morocco, where the provision of freshwater near the  
280 breeding colony significantly enhanced breeding productivity (62).

281 A noticeable peculiarity in connection with the feeding ecology is the frequent proximity of the  
282 breeding habitats to human settlements. From historical reports this is evident for the former  
283 European population (11–13,16). It is also known for most former breeding sites in Moroccan and  
284 Algerian Atlas (6,60), in Turkey (25,27) and for the former wintering site in Ethiopia (57). It is assumed  
285 that the presence of the species in various regions was dependent on human beings which cleared or  
286 drained the land and kept it open through farming or grazing (12,13,16,60). This can be regarded as a  
287 kind of mutualism, because the birds have benefited from the open sites and have eaten larvae of pest  
288 insects for their part. But as with many other species, proximity to humans ultimately also carries a  
289 high risk for the species depending on the respective culture and period.

290 Also, the breeding sites were often close to human settlements. But this was probably more of a  
291 coincidence than a mutualistic relationship. The Northern Bald Ibis as a colonial breeder needs cliffs  
292 which are structured with niches or ledges (Fig 5). Many such cliffs consisted of limestone or  
293 conglomerate, located on the sea, along large rivers or on lake shores. And these were often also

294 preferred areas for establishing human settlements. Examples are the former Turkish colony in Bireçik  
295 at the river Euphrates (25, Fig 6) or former European colony sites like Salzburg on the river Salzach (Fig  
296 7), Passau on the river Danube or Uerberlingen at Lake Constance (12). This coincidence also  
297 contributed to the extinction, indirectly through disturbance and destruction of the breeding sites, but  
298 also through hunting and collection of nestlings out of the nests.

299 **Fig 5. Breeding cliff in Agadir, Morocco.** Picture D. Tome.

300 **Fig 6. Breeding cliff in Birecik, Turkey.** Picture J Fritz.

301 **Fig. 7. Breeding cliff in Kuchl, Austria.** Picture J Fritz.

## 302 **Akh and the eastern horizon**

303 From the point of view of ancient Egyptian cosmology and religion, the most important place linked to  
304 the idea of the *akh* and related notions was the horizon. Not only did the Egyptian term for the  
305 horizon (*akhet*) share the word-root *akh*, but it also cohered with the ideas connected with the  
306 afterlife and the divine sphere. The horizon represented the junction three main cosmic realms, the  
307 earth, the sky and the underworld, and as a place of sunrise it was also considered to be the symbolic  
308 place of birth, renewal and resurrection. The blessed deceased (the *akhu*) who overcame the  
309 obstacles of death and successfully ended their journey through the underworld at the eastern  
310 horizon of heaven.

311 The eastern horizon was, thus, closely linked with the *akhu* who were believed dwell at and come  
312 from the *akhet* (i.e. the eastern horizon). In fact, ancient Egyptian sources witness that the *akhu* are  
313 'born' or 'created' in the *akhet* and their often refer to the blessed deceased as to those "who dwell at  
314 the horizon" (39,43,44). The Egyptian hieroglyphic sign of the (eastern) horizon had a shape of rocky  
315 peak or rather a cliff massive with two peaks. Throughout the Nile valley, the eastern horizon is in fact  
316 created by limestone cliff massif with occasional peaks. And knowing how precise the Egyptians were  
317 in observing nature, it is not by accident that the transfigured blessed deceased were denoted *akhu*

318 and that the hieroglyphic sign used for them was a picture of the Northern Bald Ibis: the birds and  
319 the dead occupied the same habitat.

## 320 **Characteristic Northern Bald Ibis behaviours**

321 The Northern Bald Ibis is a year-round social species with hierarchically structured colonies consisting  
322 of up to several thousand individuals. The species is monogamous, where some couples form long-  
323 lasting bonds while others stay together only for a breeding-season. Both partners breed and raise the  
324 chicks, as it is characteristic for many monomorphic species (63). Fledging rate varies considerably  
325 between the populations, ranging from 1.0 to 2.2 chicks per nest dependent on site and condition  
326 (10). According to data from the European release project, the family groups already dissolve in the  
327 breeding area. The juveniles join together in groups which follow experienced conspecifics to the  
328 wintering site (64).

329 The species has a rather moderate repertoire of calls. Most common is the '*croop*' call, which is used  
330 in an affiliative context - the characteristic greeting behaviour with the rhythmic vertical movement of  
331 the beak - as well as during agonistic encounters (65). The '*croop*' was found to have highly variable  
332 temporal and structural parameters, which may indicate the expression of affective states and even  
333 encode individual differences that allow individual recognition (66). This results in parallel with a  
334 morphological characteristic of the species, the conspicuous bare head. In adult birds, the pattern of  
335 the dark areas allows individual recognition, even for humans (67). Moreover, in males the bare throat  
336 area varies in size between individuals and has a seemingly hormonally controlled variation in the  
337 intensity of the red colouration (68). According to that it is assumed that the bare head of the  
338 Northern Bald Ibis evolved mainly in the context of social interaction and mate choice. However, there  
339 is also some evidence that in species like the Northern Bald Ibis inhabiting hot environments bare skin  
340 has evolved to dissipate heat (69).

341 A noticeable and characteristic behaviour of the Northern Bald Ibis, as of other Ibises  
342 (*Threskiornithidae*), is the sunning resp. sun-bathing behaviour, where the bird remaining in a stiff

343 upright position with wings outstretched (Fig 8). This behaviour, also known as sun worship, has  
344 contributed to the veneration of this species in various cultures (7). However, the actual function of  
345 this behaviour is still unclear (70). Hypotheses are thermoregulation, killing of ecto-parasites by  
346 heating the feathers and the body surface or vitamin D-synthesis by exposition of bare skin on the  
347 underside of the wing to the sun. In any case, sunning behaviour has a clear social component, when a  
348 bird starts with it, it usually stimulates other conspecifics, which makes this behaviour even more  
349 conspicuous.

350 **Fig 8. Sunning behaviour.** Picture M. Unsoeld.

### 351 **Social aspect of the *akh***

352 The *akh* had a unique position within the ancient Egyptian concept of the natural world. The highest  
353 position among all cosmic beings was held by the gods and the lowest was reserved for human beings,  
354 but the boundaries between the human and divine worlds were occupied by semi-divine entities with  
355 super-natural status and power, mainly the blessed and the damned dead. If a person's underworld  
356 journey has successfully finished with justification and acceptance into the afterlife, such person was  
357 transfigured into an *akh*, and thus became a mighty and influential entity with supernatural powers  
358 who still had some influence upon the world of the living. The *akh* guarded their tombs, would on the  
359 one hand punish intruders, and on the other help those who made pleas to them. The *akh* would  
360 help the living in cases when human abilities were insufficient. The dead, however, still needed the  
361 support of the living, who performed rituals, mummification and funerary rites, and, most importantly,  
362 the living provided their dead ancestors with offerings. The *akh* and the living represented co-  
363 dependent communities. The mutual relationship of these two communities of cosmic beings formed  
364 one of the main pillars of ancient Egyptian religion (37,39).

365 It was this bilateral *akh*-efficiency of reciprocal actions what helped to cross the threshold of death  
366 and bridged the boundaries of this world and the afterlife. The *akh* represented by the Northern Bald  
367 Ibis both in iconography and in the real world held the role of influential intermediators and

368 guarantors of survival. For Egyptians of lower social strata, the *akhu* were even more important than  
369 the gods.

370 The society of the blessed dead had also its own hierarchy structured similarly to the world of living. At  
371 the very top of the *akhu*, there was only one person: the deceased king. According to the Pyramid  
372 Texts (e.g. § 833, 858, 869, 899, 903), the Egyptians called him 'the head of the *akhu*' or 'the first of  
373 the *akhu*' or even 'the *akh* of the *akhu*'. Like in the real world, also the society of the *akhu* had a  
374 pyramidal structure. Below the sole position of the king there were 'successful and well-equipped  
375 *akhu* (of the sun god)' who often recruited from the strata of elite officials. For the non-elite  
376 Egyptians, however, deceased family members and local patrons represented the most important  
377 allies in the afterlife. The strictly hierarchical structure of the *akh* society with only one entity at the  
378 very top may have not only reflect the structure of human society but may have also stemmed from  
379 the well-observed V-formation used by the birds during migration (64).

## 380 **Northern Bald Ibis migration**

381 The Northern Bald Ibis was a migratory species all over the historic range with known wintering sites  
382 along the African west coast down to Mauritania and Mali and along the African east coast down to  
383 Ethiopia and Eritrea (29,58,71). For the former European population, it is know that they left in  
384 autumn and returned in spring, but any evidence for the migration pathway or the historic wintering  
385 site is lacking (12,13). The migratory European release population migrate to a wintering site in the  
386 southern Tuscany. However, this sites was selected for the release not on the basis of historic records,  
387 but rather due to the current and sustainable suitability of the habitats (71).

388 Under appropriate ecological and climatic conditions colonies of various migratory species are known  
389 to shorten their migration route or change to a resident lifestyle. This happens especially along  
390 coastlines with year-round moderate climatic conditions (72). This also applied for the Northern Bald  
391 Ibis. Several resident colonies are known along the Atlantic coast in Morocco, but such colonies



392 probably also existed along the Red Sea. Meanwhile, all migrating colonies have been eradicated,  
393 while two residential colonies on the Atlantic coast still exist (58,60).

394 Due to extinction of all migratory colonies most knowledge about the species-specific migration  
395 behaviour mainly comes from the migratory European release population. These birds are  
396 descendants of former migratory colonies in the Moroccan Atlas. Research on physiology, energetics  
397 and behaviour has shown that the Northern Bald Ibis is an enduring migratory species with a  
398 pronounced navigation ability. In Europe, the birds enter into a migratory state (Zugbereitschaft)  
399 beginning of August (73,74). At that time, they leave their breeding areas and usually return in the  
400 next season from the end of March (75). The Middle East colonies (mainly Bireçik and Palmyra) had  
401 their rhythm shifted by about one month with departure in early July and return from the end of  
402 February (10,29).

403 Northern Bald Ibises are persistent flyers with a daily migration flight stages of up to 350 km  
404 (30,31,75) and an average flight speed of about 45 km/h (76). They use different flight techniques to  
405 save energy. The most noticeable one is the V-shaped or echelon formation, where energy savings can  
406 be achieved by using the aerodynamic up-wash produced by the preceding bird (77). As the leading  
407 bird in a formation cannot profit from this up-wash, a social dilemma arises around the question of  
408 who is going to fly in front. The Northern Bald Ibises solve this dilemma by directly taking turns in  
409 leading the formation (78). This is assumed to be one of the rare examples of real cooperation in the  
410 animal kingdom (79).

## 411 ***Akh* migration**

412 Although have almost no physical evidence on the presence of the Northern Bald Ibis in ancient Egypt  
413 and on the nature of its stay there, we may strongly presume that the bird was only a migratory visitor  
414 to the country on the Nile. This is based upon the already discussed nature of the bird, character of its  
415 Egyptian habitat (see above) and – strangely enough for some – upon ancient religious texts. The  
416 Egyptian connected the deceased with migratory birds whom they saw as messengers from the realm

417 of the dead. In a famous line attested in royal tombs of the New Kingdom, migratory birds are  
418 described as beings with avian bodies and human heads coming to Egypt from the North, from the  
419 region of utmost darkness (80). However, no direct evidence of the possible migration of the Northern  
420 Bald Ibis to, from or via Egypt has not yet been attested. In this respect, there are questions that need  
421 to be answered.

422 Does the bird's Egyptian habitat (limestone cliffs) provide us with any clue to the nature of its  
423 presence in the country and its possible migration? Does any of the three seasons of the Egyptian year  
424 (the season of high inundation, the season of growth and the season of low water) fit more to the  
425 needs of the bird? Was the appearance of the *Akh* star/constellation on the night sky a particular  
426 period of the year somehow connected with the arrival or departure of Northern Bald Ibises to/from  
427 the country? The problem still needs to be studied, as its solution may shed a new light on many  
428 aspects of ancient Egyptian view of the natural world as a sacred space. Close multidisciplinary  
429 cooperation on the topic would give us the best change to solve the problem.

## 430 **Endangerment and disappearance of the Northern Bald Ibis**

431 In 2018, after 24 years, the species was down-listed on the IUCN Red List from *critically endangered* to  
432 *endangered*. This was mainly justified by successful conservation measures to secure the last wild  
433 population in Morocco. However, this decision was controversial. Although this population has  
434 developed well in recent years and signs of expansion of the breeding area have even been observed  
435 (10,81), it remains so far the world's only wild population, spatially restricted to a small area on the  
436 Atlantic coast in Morocco. The significant decline of the population in 1996 as a result of an epidemic  
437 (82) and the dependence of the population on management like the provision of supplementary fresh  
438 water (62) indicate that this one population cannot ensure permanent survival of the species.

439 Accordingly, the major purpose of the International *Single Species Action Plan for the Conservation of*  
440 *the Northern Bald Ibis*, published in 2015 and foreseen for a ten-year period (83), is to increase the  
441 population size and the breeding range of the species. This should mainly be achieved by improved

442 management of the existing Moroccan colonies and establishment of new colonies, with a particular  
443 focus on former breeding area outside Europe, where colonies recently disappeared.

444 Though, by the halfway point of the action plan no concrete translocation projects had been initiated  
445 in these regions. This has mainly economic, logistical or political reasons but is also related to the fact  
446 that former causes of extinction are still present in these areas, in particular uncontrolled hunting,  
447 electrocution, poisoning and the ongoing destruction of habitats (29,32,84).

448 Meanwhile, two successful reintroduction projects are being implemented in Europe. *Proyecto*  
449 *Eremita* in Andalusia, Spain, is on the way to establish a residential population which consisted of  
450 around 140 individuals end of 2019 colony (10). The birds breed at three side in an area of 23 km  
451 along the Atlantic coast in Andalusia. Every year around 40 juveniles from various European zoo  
452 breeding colonies are supplemented to build up a self-sustaining population (M Quevedo, pers.com.).

453 At the same time *Waldrappteam* establishes a migratory colony in Central Europe (4,71) with 142  
454 birds end of 2021, divided into three breeding colonies north of the Alps and one further colony in  
455 Carinthia, Austria. These birds migrate along two distinct migration corridors between the breeding  
456 sites and the wintering site in southern Tuscany. The project became famous because of the human-  
457 led migration, where human-raised and trained juveniles follow their foster parents in two microlight  
458 planes from the breeding sites to the wintering area, where they will then be released (Fig 9). A  
459 population viability analysis indicates that the population needs a minimum size of about 320  
460 individuals for self-sustainability (85). This threshold should be exceeded in the mid-2020s. Modelled  
461 scenarios also indicate that this European population is relatively stable against stochastic events that  
462 can be caused, for example, by climate change (85).

463 **Fig 9. Human led migration flight across the Austrian Alps.** Picture C. Esterer.

## 464 **Akh disappearance**

465 As has already been discussed above, we lack physical evidence on the presence of the Northern Bald  
466 Ibis in Egypt. Thus, unfortunately, one can only use pictorial and textual evidence in researching the

467 nature of the presence of the bird in the country. In this respect, a particularly noteworthy fact can be  
468 revealed by analysis of the Northern Bald Ibis iconographic features. Pictorial evidence on the bird is  
469 much more accurate, precise, and elaborate in the early periods of Egyptian history, until the final  
470 phase of the third millennium BC (8). In later times, the representations of this ibis become very  
471 schematized, sometimes they even do not correspond to their natural model very much. They cannot  
472 be viewed as convincing evidence for the presence of the Northern Bald Ibis in Egypt. Moreover, there  
473 is no material, pictorial, or textual evidence for keeping, breeding, hunting, killing, mummifying, or  
474 sacrificing the Northern Bald Ibis in ancient Egypt from any period of its history. We have no evidence  
475 for hunting or sacrificing the bird in Egypt, nor was it kept in temples and mummified at death (48,86).  
476 The last mentioned fact stands in striking contrast to the Sacred Ibis and the Glossy Ibis (*Plegadis*  
477 *falcinellus*) that are known to have been kept and mummified (48,87); there are many thousand  
478 mummified examples of the Sacred Ibis (*Threskiornis aethiopicus*) (86).  
479 Judging from iconographic evidence, at the latter phase of the Old Kingdom (towards the end of the  
480 third millennium BC), the Northern Bald Ibis has begun to disappear from Egypt, or rather it has  
481 altered its migration routes, avoiding Egypt at all or making only a few stops there, or that the present  
482 migration route of the Northern Bald Ibis from Ethiopia to Syria that avoids Egypt (30) already  
483 originated at the beginning of the second millennium BC (8). By why this change occurred?  
484 Here again we face a problem that can only be solved by a close multidisciplinary nature-human  
485 science cooperation. At the present stage of research, we are able to ascertain that the time of the  
486 disappearance of the Northern Bald Ibis from ancient Egypt follows a climate change period: a period  
487 of a swift desiccation of the country and expansion of arid areas that occurred in the first half of the  
488 third century when many other animal and avian species left the country (88–90). But unlike the  
489 Elephant, the Giraffe or the Saddle-Billed Stork who disappeared from Egypt during the time of the  
490 climate change and a gradual desiccation, the Northern Bald Ibis is leaving only 500 years later.

491 Data gained from a case-study made on the Saddle-billed Stork (*Ephippiorhynchus senegalensis*) can  
492 well serve as a comparative material for studies on the disappearance of the Northern Bald Ibis.  
493 Similarly to the Northern Bald Ibis, the Saddle-billed Stork was also closely connected with a very  
494 important religious concept, as its hieroglyphic depictions served to denote 'divine power' or a  
495 'manifestation of divine power on earth' (the *ba*). The study (8,91) proved that after the species  
496 disappeared from Egypt after a climate change early in the third millennium BC, first the hieroglyphic  
497 sign lost its accuracy and slowly stopped to resemble the stork at all, then the sign and Egyptian term  
498 *ba* was given a new meaning (the soul) and, finally, a completely new hieroglyphic sign (a human-  
499 headed falcon) for the *ba* was invented. The study on the stork clearly shows that the Early Dynastic  
500 climate change had a direct impact not only upon nature, human life and society, but also upon such  
501 seemingly unrelated phenomena as script, religion and philosophy (91).

502 The most important question of the present article still stands. Why the bird left the country when  
503 there were no dangers like hunting or pesticides that have endangered the species in modern times,  
504 nor there was no big harm made to it by the climate change itself? Although the research on the topic  
505 is at the very beginning, we can say that the most important factor most probably was human activity  
506 in and around the bird's feeding and breeding areas.

507 The time of the disappearance of the Northern Bald Ibis from Egypt was the period of (I) higher human  
508 activities in the fields following the need for new irrigation projects after a climate change, (II) higher  
509 building activity (the species disappeared during the so-called age of the pyramid builders), which lead  
510 to a higher human activity in the bird's breeding region at the limestone cliffs that were used as  
511 quarries) and (III) turbulent human activities linked to social disorder that occurred after the collapse  
512 of the Egyptian state at the end of the Old Kingdom, probably originally also linked with earlier climate  
513 change.

## 514 Discussion

515 Both in Egyptology and in Ornithology, the Northern Bald Ibis represents an iconic bird species.  
516 Coincidentally, it is connected with the notion of death and disappearance in both scientific fields. In  
517 ancient Egypt, the Northern Bald Ibis was linked with the concept of the blessed dead (mighty spirits  
518 called the *akhu*) who once disappeared from the land of the living but only to return there after a  
519 successful journey through the underworld (39). In ornithological and conservation science, the bird is  
520 best known for its endangerment, which almost lead to its total extinction, and for the present-day  
521 attempts to save the species and to reintroduce it back to nature (71).

522 This study is an outcome of a cross-disciplinary cooperation of the two authors and their respective  
523 scholarly fields. The research was undertaken simultaneously in the two scientific fields, each using  
524 methodology of the appropriate scholarly domain, with frequent consultations and mutual sharing of  
525 data.

526 The original aim was to broaden our modern understanding of historic notions, concepts and  
527 approaches using up-to-date data on this species, which the ancient Egyptians used to describe the  
528 religious concept in focus. Such Ornithology-to-Egyptology transfer of knowledge enriched Egyptology  
529 with information about the species' shape, colouring, habitat, social habits, migration periods and  
530 migration routes and, thus, proved to be very efficient. And with this new data, only 200 years after  
531 Egyptology as a scientific field was born, we were able to clarify our modern view of one of the key  
532 Egyptian religious concepts (the *akh*) who helped to shape human thought in Egypt for more than  
533 three millennia. Only when one closely examines the model bird and learns about the habitat,  
534 migration or social behaviour of the Northern Bald Ibis, one is able to understand the ideas hidden in  
535 the background of the concept of the *akh* (8).

536 However, an in-depth Egyptological study on the concept of the *akh* and on its hieroglyphic sign  
537 proved to be valuable for Ornithologists as well. First, after gaining information from ancient Egyptian  
538 texts (some of them more than 4500 years old), Egyptologists were able to discern the V-shaped flight

539 formation of the Northern Bald Ibis as an important piece of evidence for the migration behaviour of  
540 the species in this region in ancient times. The most important result of the Egyptological part of the  
541 research on the Northern Bald Ibis was represented by the gaining of significant data to show that the  
542 bird had disappeared from Egypt during late third millennium BC after a climate change (8). With this  
543 research step the Egyptology-to-Ornithology transfer of data, information and knowledge began or  
544 became stronger. Not only one can follow the bird's presence, habits and habitats almost 5.000 years  
545 back to history of the world, but the evidence is formed by textual and pictorial materials, not only by  
546 bones and other bodily remains.

547 Ancient Egyptian sources thus present us with valuable information both on the presence of the  
548 Northern Bald Ibis in the Egyptian Nile Valley and Delta and on its early disappearance. But what is of  
549 utmost importance is the fact that these ancient sources witness an indirect link of the bird's  
550 disappearance from Egypt to the climate change.

551 The bird disappeared from Egypt more than 500 years after the climate change, as the reasons for the  
552 disappearance were rather connected with changes in human behaviour resulting from the climate  
553 change effects. The time of when the Northern Bald Ibis began to leave Egypt was the period of higher  
554 human activities in the bird's feeding area (following the need for new irrigation projects after a  
555 climate change), increased quarrying and building activities in the bird's breeding areas (the age of the  
556 pyramid builders), and last but not least, turbulent human activities stemming from social disorder  
557 after the collapse of the Egyptian state at the end of the Old Kingdom (this socio-political  
558 phenomenon was also originally connected with the earlier climate change).

559 Climate change is also an increasing threat to the last remaining wild population in Morocco. Morocco  
560 is among the countries which are expected to have the strongest effects in terms of temperature-rise,  
561 decreased of precipitation and weather extremes and the coastal region is assumed to be particularly  
562 affected (92). This will put increasing pressure on the Northern Bald Ibis population there. Under these  
563 changing conditions the residential lifestyle of this coastal population can become detrimental  
564 because residential populations lack ecological flexibility related to migration behaviour and there is

565 hardly any evidence that residential populations are able to change back to a migratory lifestyle  
566 (72,79,93–95).

567 Noteworthy in this context, the *Single Species Action Plan for the Conservation of the Northern Bald*  
568 *Ibis* (83) don't considers climate change, the term doesn't even show up once in the whole text (83).

569 This although the ecosystems of the majority of these areas are assumed to be disproportionately  
570 affected by climate change effects (96). History teaches us that Northern Bald Ibis populations can be  
571 significantly affected by the consequences of climate change. Therefore, regarding the purpose of the  
572 Action Plan to re-colonize former habitats, feasibility study should include modelling to examine  
573 whether newly established colonies can be sustainable with respect to climate change effects and  
574 related stochastic events. Such a feasibility study should also differentiate between scenarios for  
575 migratory and sedentary colonies as we have knowledge of the differences in ecological flexibility due  
576 to these different lifestyles (85).

577 Future interdisciplinary research shall focus the forms of human activities connected to the bird's  
578 decline in more detail. This should endow natural scientists and conservationists with data that could  
579 support future conservation and reintroduction attempts with the Northern Bald Ibis and other  
580 endangered species, which is the highest goal of the two scholarly fields. **Then the Northern Bald Ibis**  
581 **and the ancient Egyptian *akh* would again share the same meaning: a living entity that was gloriously**  
582 **resurrected after being dead.**

## 583 Conclusion

584 Tracing the history of the Northern Bald Ibis for several millennia provides us with some significant  
585 information about the coexistence of these bird species and humans in different epochs and regions.  
586 Coexistence in the form of a mutualistic relationship has worked well for long periods of time. But at  
587 some point, the situation changed to the disadvantage of the birds. Interestingly, significant changes  
588 that ultimately led to the extinction of Northern Bald Ibis populations were repeatedly accompanied  
589 by marked changes in the climate. This applies to the extinction of the population in ancient Egypt as



590 well as of the European population in the Middle Ages and climate change also currently poses an  
591 increasing threat to the last remaining wild population in Morocco. The historical context indicates  
592 that we need to pay special attention to climate-change related effects in conserving and  
593 reintroducing this species. The interdisciplinary approach also illustrates that the conservation of the  
594 Northern Bald Ibis is also of significant cultural importance, not only because of historic meaning of  
595 this mythical species in different cultures but also to ensure that the Northern Bald Ibis can continue  
596 to enrich human culture in the future.

## 597 Acknowledgments

598 We are grateful to Markus Unsoeld (Bavarian State Collection) and Katharina Huchler (Waldrappteam  
599 Conservation & Research) for discussions and helpful comments on the manuscript.

## 600 References

- 601 1. Bennett NJ, Roth R, Klain SC, Chan KMA, Clark DA, Cullman G, et al. Mainstreaming the social  
602 sciences in conservation. *Conserv Biol.* 2017;31(1):56–66.
- 603 2. Campbell LM. Overcoming obstacles to interdisciplinary research. *Conserv Biol.*  
604 2005;19(2):574–7.
- 605 3. Janák J. Running with images: Ritualized script in the Vogellauf, Rudderlauf and Vasenlauf. In:  
606 M. Bárta JJ, editor. *Profane Landscapes, Sacred Spaces*. Sheffield: Equinox; 2020. p. 89–96.
- 607 4. Fritz J, Unsoeld M, Voelkl B. Back into European Wildlife: The Reintroduction of the Northern  
608 Bald Ibis (*Geronticus eremita*). In: Kaufman A, Bashaw M, Maple T, editors. *Scientific  
609 Foundations of Zoos and Aquariums: Their Role in Conservation and Research*. Cambridge  
610 University Press; 2019. p. 339–66.
- 611 5. Fritz J, Unsoeld M. Artenschutz für einen historischen Schweizer Vogel: der Waldrapp im  
612 Aufwind. *Wildbiologie Int.* 2011;5(17).

- 613 6. Pegoraro K. Der Waldrapp. Wiesbaden: AULA-Verlag; 1996.
- 614 7. Hirsch U. Die Rettung der heiligen Vögel. Tierpark. 1976;9:4–11.
- 615 8. Janák J. Spotting the Akh . The Presence of the Northern Bald Ibis in Ancient Egypt and Its Early  
616 Decline. J Am Res Cent Egypt. 2011;46:17–32.
- 617 9. Bowden CGR, Aghnaj A, Smith KW, Ribí M. The status and recent breeding performance of the  
618 critically endangered Northern Bald Ibis *Geronticus eremita* population on the Atlantic coast of  
619 Morocco. Ibis (Lond 1859). 2003;145(3):419–31.
- 620 10. Boehm C, Bowden C, Seddon P, Hatipoglu T, Oubrou W, el Bekkay M, et al. Northern Bald Ibis:  
621 History, current status, and future perspectives. Oryx. 2020;(in press).
- 622 11. Gesner C. *Historiae animalium liber III, qui est de avium natura*; erste deutsche Übersetzung.  
623 Zurich: Christoffel Froschouer; 1557.
- 624 12. Schenker A. Das ehemalige Verbreitungsgebiet des Waldrapps *Geronticus eremita* in Europa.  
625 Der Ornithol Beobachter. 1977;74:13–30.
- 626 13. Unsoeld M, Fritz J. Der Waldrapp-ein Vogel zwischen Ausrottung und Wiederkehr. Wildbiologie  
627 2 1-16. 2011;2:1–16.
- 628 14. Kumerloeve H. Waldrapp, *Gerontocus eremita* (LINNAEUS 1758) und Glatt nackenrapp,  
629 *Geronticus calvus* (BODDAERT 1783): Zur Geschichte ihrer Erforschung und zur gegenwärtigen  
630 Bestandssituation. Ann Naturhistor Mus Wien. 1978;81:319–49.
- 631 15. Sánchez I. Evidence of the historic presence of the Northern Bald Ibis ( *Geronticus eremita* ) in  
632 Spain. 2006.
- 633 16. Perco F, Tout P. Notes on recent discoveries regarding the presence of the Northern Bald Ibis  
634 *Geronticus eremita* in the Upper Adriatic Region. *Acrocephalus*. 2001;22(106–107):81–7.
- 635 17. Boev Z. Presence of Bald Ibises (*Geronticus* Wagler 1832) (*Threskionitidae* (sic) - Aves) in the  
636 Late Pliocene of Bulgaria. *Geol Balc*. 1998;28(1-2):45–52.

- 637 18. Hölzinger J. Waldrapp (*Geronticus eremita*): Knochenfunde aus der spätrömischen Befestigung  
638 Sponeck am Kaiserstuhl. *OrnJhBaden-Württemberg*. 1988;57–67.
- 639 19. Mourer-Chauviré C, Philippe M, Guillard S, Meyssonier M. Presence of the Northern Bald Ibis  
640 *Geronticus eremita* (L.) during the Holocene in the Ardèche valley, southern France. *Ibis* (Lond  
641 1859). 2006;148(4):820–3.
- 642 20. Wirtz S, Boehm C, Fritz J, Kotrschal K, Veith M, Hochkirch A. Optimizing the genetic  
643 management of reintroduction projects: Genetic population structure of the captive Northern  
644 Bald Ibis population Sarah Wirtz. *Conserv Genet*. 2018;19(4):853–64.
- 645 21. Schenker A. Der Waldrapp - ein historisches Wildbret. *Wildbiologie*. 1981;4(7):1–12.
- 646 22. Kinzelbach RK. The distribution of the serin (*Serinus serinus* L., 1766) in the 16th century. *J*  
647 *Ornithol*. 2004;145(3):177–87.
- 648 23. Bauer KM, Blutz von Blotzheim UN. *Handbuch der Vögel Mitteleuropas*. Frankfurt am Main: Ak.  
649 Verlagsgesellschaft; 1966.
- 650 24. Peter H. *Waldrappdämmerung am Euphrat*. Heidelberg: Max Kasperek Verlag; 1990.
- 651 25. Hirsch U. Der Waldrapp *Geronticus eremita*, ein Beitrag zur Situation in seinem östlichen  
652 Verbreitungsgebiet. *Vogelwelt*. 1980;101:219–36.
- 653 26. Hatipoglu T. Conservation Project , Birecik , Turkey. Report of 4th IAGNBI Meeting Seekirchen  
654 (Ed C Boehm & C Bowden). 2016;40–6.
- 655 27. Yenyurt C, Opper S, Isfendiyaroglu S, Özkinaci G, Erkol IL, Bowden C. Influence of feeding  
656 ecology on breeding success of a semi-wild population of the critically endangered Northern  
657 Bald Ibis *Geronticus eremita* in southern Turkey. *Bird Conserv Int*. 2016;1–13.
- 658 28. Serra G, Abdallah MS, Assaad A, Abdallah A, al Qaim G, Fayad T, et al. Discovery of a relict  
659 breeding colony of northern bald ibis *Geronticus eremita* in Syria. *Oryx*. 2004;38(2):1–7.
- 660 29. Serra G, Lindsell JA, Peske L, Fritz J, Bowden CGR, Bruschini C, et al. Accounting for the low

- 661 survival of the Critically Endangered northern bald ibis *Geronticus eremita* on a major  
662 migratory flyway. *Oryx*. 2014;49(2):312–20.
- 663 30. Lindsell JA, Serra G, Peške L, Abdullah MS, Al Qaim G, Kanani A, et al. Satellite tracking reveals  
664 the migration route and wintering area of the Middle East population of Critically Endangered  
665 northern bald ibis *Geronticus eremita*. *Oryx*. 2009;43(3):329–35.
- 666 31. Fritz J, Riedler B. Neue Hoffnung für das Überleben einer hoch bedrohtesten Zugvogelart im  
667 Mittleren Osten: Freisetzung von Jungvögeln bei den letzten migrierenden Waldrappen in  
668 Syrien. *Vogelwarte*. 2010;48:417–8.
- 669 32. Serra G. The Northern Bald Ibis is extinct in the Middle East - but we can't blame it on IS.  
670 *Ecologist* [Internet]. 2015;(May). Available from: The Northern Bald Ibis is extinct in the Middle  
671 East - but we can't blame it on IS
- 672 33. Friedman F. On the Meaning of Akh in Egyptian Mortuary Texts (doctoral thesis). Brown  
673 University; 1981.
- 674 34. Friedman F. A Review of Akh: Une Notion Religieuse Dans L'Égypte Pharaonique by Gertie  
675 Englund. *J Am Res Cent Egypt*. 1982;19:145–8.
- 676 35. Friedman F. Akh. In: Redford DB, editor. *Oxford Encyclopedia of Ancient Egypt I*. Oxford: Oxford  
677 University Press; 2001.
- 678 36. Smith M. *Traversing eternity: texts for the afterlife from Ptolemaic and Roman Egypt*. Oxford:  
679 Oxford University Press; 2009.
- 680 37. Janák J. *Staroegyptské náboženství II. Život a úděl člověka*. Praha: Oikoymenh; 2012.
- 681 38. Assmann J. *Tod und Jenseits im alten Ägypten*. München: C.H. Beck; 2001.
- 682 39. Janák J. Northern Bald Ibis (Akh-Bird). In: *UCLA Encyclopedia of Egyptology* [Internet]. Los  
683 Angeles: University of California in Los Angeles; 2013. Available from:  
684 <http://digital2.library.ucla.edu/viewItem.do?ark=21198/zz002dwqt8>

- 685 40. Leprohon RJ. Gatekeepers of This and the Other World. *J Soc Study Egypt Antiq.* 1994;24:77–  
686 91.
- 687 41. Jansen-Winkler K. “Horizont” und “Verklärtheit“: Zur Bedeutung der Wurzel Ax. *Stud zur*  
688 *Altägyptischen Kult.* 1996;23:201–15.
- 689 42. Allen JP. The Cosmology of the Pyramid Texts. In: *Religion and Philosophy in Ancient Egypt*, Yale  
690 *Egyptological Studies 3.* New Haven: Yale University Press; 1989. p. 1–29.
- 691 43. Allen JP. Reading a Pyramid. In: C. Berger, editor. *Homages à Jean Leclant Volume 1: Études*  
692 *pharaoniques.* Cairo: Orientale, Institut Français d’Archéologie; 1994.
- 693 44. Hays HM. Unreading the Pyramids. *Le Bull l’Institut français d’archéologie Orient.* 2009;195–  
694 220.
- 695 45. Demarée RJ. *The Ax iqr n Ra-stelae on Ancestor Worship in Ancient Egypt.* Leiden; 1983.
- 696 46. Boehm C, Pegoraro K. *Der Waldrapp: Ein Glatzkopf in Turbulenzen.* Neue Brehm.  
697 *Hohenwarsleben: Westarp Verlag; 2011.*
- 698 47. Fritz J, Unsoeld M. Aufwind für den Waldrapp : Von der Wiederansiedlung eines europäischen  
699 *Zugvogels.* *Jahrb des Vereins zum Schutz der Bergwelt.* 2013;78:121–38.
- 700 48. Boessneck J. *Die Tierwelt des Alten Ägypten.* Munich: C.H. Beck; 1988.
- 701 49. Janák J. A question of size: A remark on early attestations of the ba hieroglyph. *Stud zur*  
702 *Altägyptischen Kult.* 2011;143–53.
- 703 50. Dunham D. An Egyptian diadem of the Old Kingdom. *Bull Museum Fine Arts.* 1946;23–9.
- 704 51. Staehelin E. *Untersuchungen zur ägyptischen Tracht im Alten Reich (doctoral thesis).* Hessen,  
705 *Berlin; 1966.*
- 706 52. Kees H. *Der Opfertanz des ägyptischen Königs.* München; 1912.
- 707 53. Decker M, Herb W. *Bildatlas zum Sport im alten Ägypten. Corpus der bildlichen Quellen zu*  
708 *Leibesübungen, Spiel, Jagd, Tanz und verwandten Themen.* Leiden, New York & Cologne: Brill;

- 709 1994.
- 710 54. Zoufal K, Fritz J, Bichler M, Kirbauer M, Markut T, Meran I, et al. Feeding ecology of the  
711 Northern Bald Ibis in different habitat types: An experimental field study with handraised  
712 individuals. Report of the 2nd IAGNBI Meeting. 2007.
- 713 55. Fritz J, Wirtz S, Unsoeld M. Aspekte der Nahrungsökologie und Genetik des Waldkräppchens : Reply  
714 zu Bauer et al . ( 2016 ) Vogelneozoen in Deutschland - Revision der nationalen  
715 Statureinstufungen. Vogelwarte. 2017;55:141–5.
- 716 56. Serra G, Abdallah MS, al Qaim G. Feeding ecology and behaviour of the last known surviving  
717 Northern Bald Ibises, *Geronticus eremita*, at their breeding quarter in Syria. Zool Middle East.  
718 2008;43:55–68.
- 719 57. Serra G, Bruschini C, Peske L, Kubsch A, Wondrausch M, Lindsell JA. An assessment of ecological  
720 conditions and threats at the Ethiopian wintering site of the last known eastern colony of  
721 Critically Endangered Northern Bald Ibis *Geronticus eremita*. Bird Conserv Int. 2013;150(4).
- 722 58. Bowden CGR, Smith KW, Bekkay M El, Oubrou W, Aghnaj A, Jimenez-Armesto M. Contribution  
723 of research to conservation action for the Northern Bald Ibis *Geronticus eremita* in Morocco.  
724 Bird Conserv Int. 2008;18:74–90.
- 725 59. Serra G, Peske L, Abdallah MS, al Qaim G, Kanani A. Breeding ecology and behaviour of the last  
726 wild oriental Northern Bald Ibises (*Geronticus eremita*) in Syria. J Ornithol. 2009;150(4):769–  
727 82.
- 728 60. Schenker A, Cahenzli F, Gutbrod KG, Thevenot M, Erhardt A. The Northern Bald Ibis *Geronticus*  
729 *eremita* in Morocco since 1900: Analysis of ecological requirements. Bird Conserv Int [Internet].  
730 2019;1–22. Available from:  
731 [https://www.cambridge.org/core/product/identifier/S0959270919000170/type/journal\\_article](https://www.cambridge.org/core/product/identifier/S0959270919000170/type/journal_article)
- 732 61. Yenyurt C. Conservation of the Northern Bald Ibis, Birecik, Turkey 2013-2016. Report of 4th  
733 IAGNBI Meeting Seekirchen (Ed. C Boehm & C Bowden). 2016.

- 734 62. Smith KW, Aghnaj A, El Bekkay M, Oubrou W, Ribi M, Armesto MJ, et al. The provision of  
735 supplementary fresh water improves the breeding success of the globally threatened Northern  
736 Bald Ibis *Geronticus eremita*. *Ibis* (Lond 1859). 2008;150(4):728–34.
- 737 63. Sorato E, Kotrschal K. Hormonal and behavioural symmetries between the sexes in the  
738 Northern bald ibis. *Gen Comp Endocrinol*. 2006;146(3):265–74.
- 739 64. Voelkl B, Fritz J. Relation between travel strategy and social organization of migrating birds with  
740 special consideration of formation flight in the northern bald ibis. *Philos Trans R Soc B Biol Sci*  
741 [Internet]. 2017;372(1727):20160235. Available from:  
742 <http://rstb.royalsocietypublishing.org/lookup/doi/10.1098/rstb.2016.0235>
- 743 65. Pegoraro K, Föger M. Die 'Chrup'-Rufe des Waldrapps *Geronticus eremita*: Ihre verschiedenen  
744 Funktionen in einem komplexen Sozialsystem. *J Ornithol*. 1995;136:243–52.
- 745 66. Szipl G, Boeckle M, Werner SAB, Kotrschal K. Mate recognition and expression of affective state  
746 in croop calls of Northern Bald Ibis (*Geronticus eremita*). *PLoS One*. 2014;
- 747 67. Pegoraro K, Föger M. Individuality in the Northern Bald Ibis or Waldrapp Ibis *Geronticus*  
748 *eremita* – key features for a complex social system. *Acrocephalus*. 2001;22:73–9.
- 749 68. Sorato E, Kotrschal K. Skin ornaments reflect social status and immunocompetence in male and  
750 female Northern Bald Ibises (*Geronticus eremita*). unpublished data.
- 751 69. Galván I, Palacios D, Negro JJ. The bare head of the Northern bald ibis (*Geronticus eremita*)  
752 fulfills a thermoregulatory function. *Front Zool*. 2017;14(1):1–9.
- 753 70. Unsoeld M, Melzer R. Sunning behaviour in Ibises (Threskiornithidae): Observations on four  
754 species at Tierpark Hellabrunn, Munich Markus. *Der Zooloigsche Garten*. 2010;79(2–3):89–104.
- 755 71. Fritz J, Kramer R, Hoffmann W, Trobe D, Unsoeld M. Back into the wild: establishing a migratory  
756 Northern bald ibis *Geronticus eremita* population in Europe. *Int Zoo Yearb*. 2017;51(1):107–23.
- 757 72. Hegemann A, Fudickar AM, Nilsson J-Å. A physiological perspective on the ecology and

- 758 evolution of partial migration. *J Ornithol* [Internet]. 2019;(August 2018). Available from:  
759 <http://link.springer.com/10.1007/s10336-019-01648-9>
- 760 73. Fritz J, Feurle A, Kotrschal K. Physiological regulation of bird migration: a study with northern  
761 bald ibises undergoing human-led autumnal migration. *J Ornithol*. 2016;147(5):168.
- 762 74. Bairlein F, Fritz J, Scope A, Schwendenwein I, Stanclova G, Van Dijk G, et al. Energy expenditure  
763 and metabolic changes of free-flying migrating northern bald ibis. *PLoS One*. 2015;10(9).
- 764 75. Fritz J. Ultraleichtflieger weisen den Weg – Der Waldkrapp in den Alpen. *Der Falke*. 2010;57:95–  
765 105.
- 766 76. Sperger C, Heller A, Voelkl B, Fritz J. Flight Strategies of Migrating Northern Bald Ibises –  
767 Analysis of GPS Data During Human-led Migration Flights. *Agit – J für Angew Geoinformatik*.  
768 2017;3:62–72.
- 769 77. Portugal SJ, Hubel TY, Fritz J, Heese S, Trobe D, Voelkl B, et al. Upwash exploitation and  
770 downwash avoidance by flap phasing in ibis formation flight. *Nature*. 2014;505(7483):399–402.
- 771 78. Voelkl B, Portugal SJ, Unsoeld M, Usherwood JR, Wilson AM, Fritz J. Matching times of leading  
772 and following suggest cooperation through direct reciprocity during V-formation flight in ibis.  
773 *Proc Natl Acad Sci* [Internet]. 2015;112(7):2115–20. Available from:  
774 <http://www.pnas.org/lookup/doi/10.1073/pnas.1413589112>
- 775 79. Voelkl B, Fritz J. Relation between travel strategy and social organization of migrating birds with  
776 special consideration of formation flight in the northern bald ibis. *Philos Trans R Soc B Biol Sci*.  
777 2017;372(1727).
- 778 80. Žabkar L. *A Study of the Ba Concept in Ancient Egyptian Texts*. Chicago: The University of  
779 Chicago Press; 1968.
- 780 81. Aourir M, Bousadik H, El Bekkay M, Oubrou W, Znari M, Qninba A. New Breeding Sites of the  
781 Critically Endangered Northern Bald Ibis *Geronticus Eremita* on the Moroccan Atlantic Coast.



- 782 Int J Avian Wildl Biol. 2017;2(3):1–4.
- 783 82. Touti J, Oumellouk F, Bowden CGR, Kirkwood JK, Smith KW. Mortality incident in northern bald  
784 ibis *Geronticus eremita* in Morocco in May 1996. *Oryx*. 1999;33(2):160–7.
- 785 83. Bowden CGR (Compiler). International Single Species Action Plan for the Conservation of the  
786 Northern Bald Ibis (*Geronticus eremita*). Vol. 55. Bonn, Germany; 2015.
- 787 84. Fritz J, Unsoeld M. Internationaler Artenschutz im Kontext der IUCN Reintroduction Guidelines:  
788 Argumente zur Wiederansiedlung des Waldrapps *Geronticus Eremita* in Europa. *Vogelwarte*.  
789 2015;53(2):157–68.
- 790 85. Drenske S, Radchuk V, Scherer C, Esterer C, Kowarik I, Fritz J, et al. From reintroduction to  
791 rewilding : Northern bald ibis ( *Geronticus eremita* ) still need management interventions for  
792 critical survival . in prep.
- 793 86. Ikram S. Divine creatures: Animal mummies in ancient Egypt. Cairo: American University in  
794 Cairo Press; 2005.
- 795 87. Houlihan P. The birds of ancient Egypt. Cairo: American University in Cairo Press; 1988.
- 796 88. Bárta M. Kolaps Staré říše, éry stavitelů pyramid? In: P. POKORNÁ; M.BÁRTA, editor. Něco  
797 překrásného se končí Kolapsy v přírodě a společnosti. Praha: Dokořán; 2008. p. 121–44.
- 798 89. Dalfes HN, Kukla G, Weiss H. Third millennium BC climate change and old world collapse.  
799 Berlin/New York: Springer; 1997.
- 800 90. Issar AS, Zohar M. Climate change: environment and civilization in the Middle East. Berlin/New  
801 York: Springer; 2004.
- 802 91. Janák J. Saddle-billed Stork (ba-bird). In: UCLA Encyclopedia of Egyptology [Internet]. Los  
803 Angeles: University of California in Los Angeles; 2014. Available from:  
804 <http://digital2.library.ucla.edu/viewItem.do?ark=21198/zz002hp1vp>
- 805 92. Schilling J, Freier KP, Hertig E, Scheffran J. Climate change, vulnerability and adaptation in

- 806 North Africa with focus on Morocco. *Agric Ecosyst Environ* [Internet]. 2012;156(January  
807 2018):12–26. Available from: <http://dx.doi.org/10.1016/j.agee.2012.04.021>
- 808 93. Visser ME, Perdeck AC, van Balen JH, Both C. Climate change leads to decreasing bird migration  
809 distances. *Glob Chang Biol*. 2009;15(8):1859–65.
- 810 94. Radchuk V, Reed T, Teplitsky C, van de Pol M, Charmantier A, Hassall C, et al. Adaptive  
811 responses of animals to climate change are most likely insufficient. *Nat Commun* [Internet].  
812 2019;10(1):3109. Available from: <http://www.nature.com/articles/s41467-019-10924-4>
- 813 95. Boehm C, Fritz J, Asmus J. Koordination und Kooperation von Zoo- und Freilandarbeit bis zur  
814 Wiederansiedlung: vier Fallbeispiele. In: W. Lantermann, Asmus J, editors. *Wildvogelhaltung*.  
815 Springer-Verlag GmbH; 2021.
- 816 96. Lelieveld J, Hadjinicolaou P, Kostopoulou E, Chenoweth J, El Maayar M, Giannakopoulos C, et  
817 al. Climate change and impacts in the Eastern Mediterranean and the Middle East. *Clim*  
818 *Change*. 2012;114(3–4):667–87.
- 819

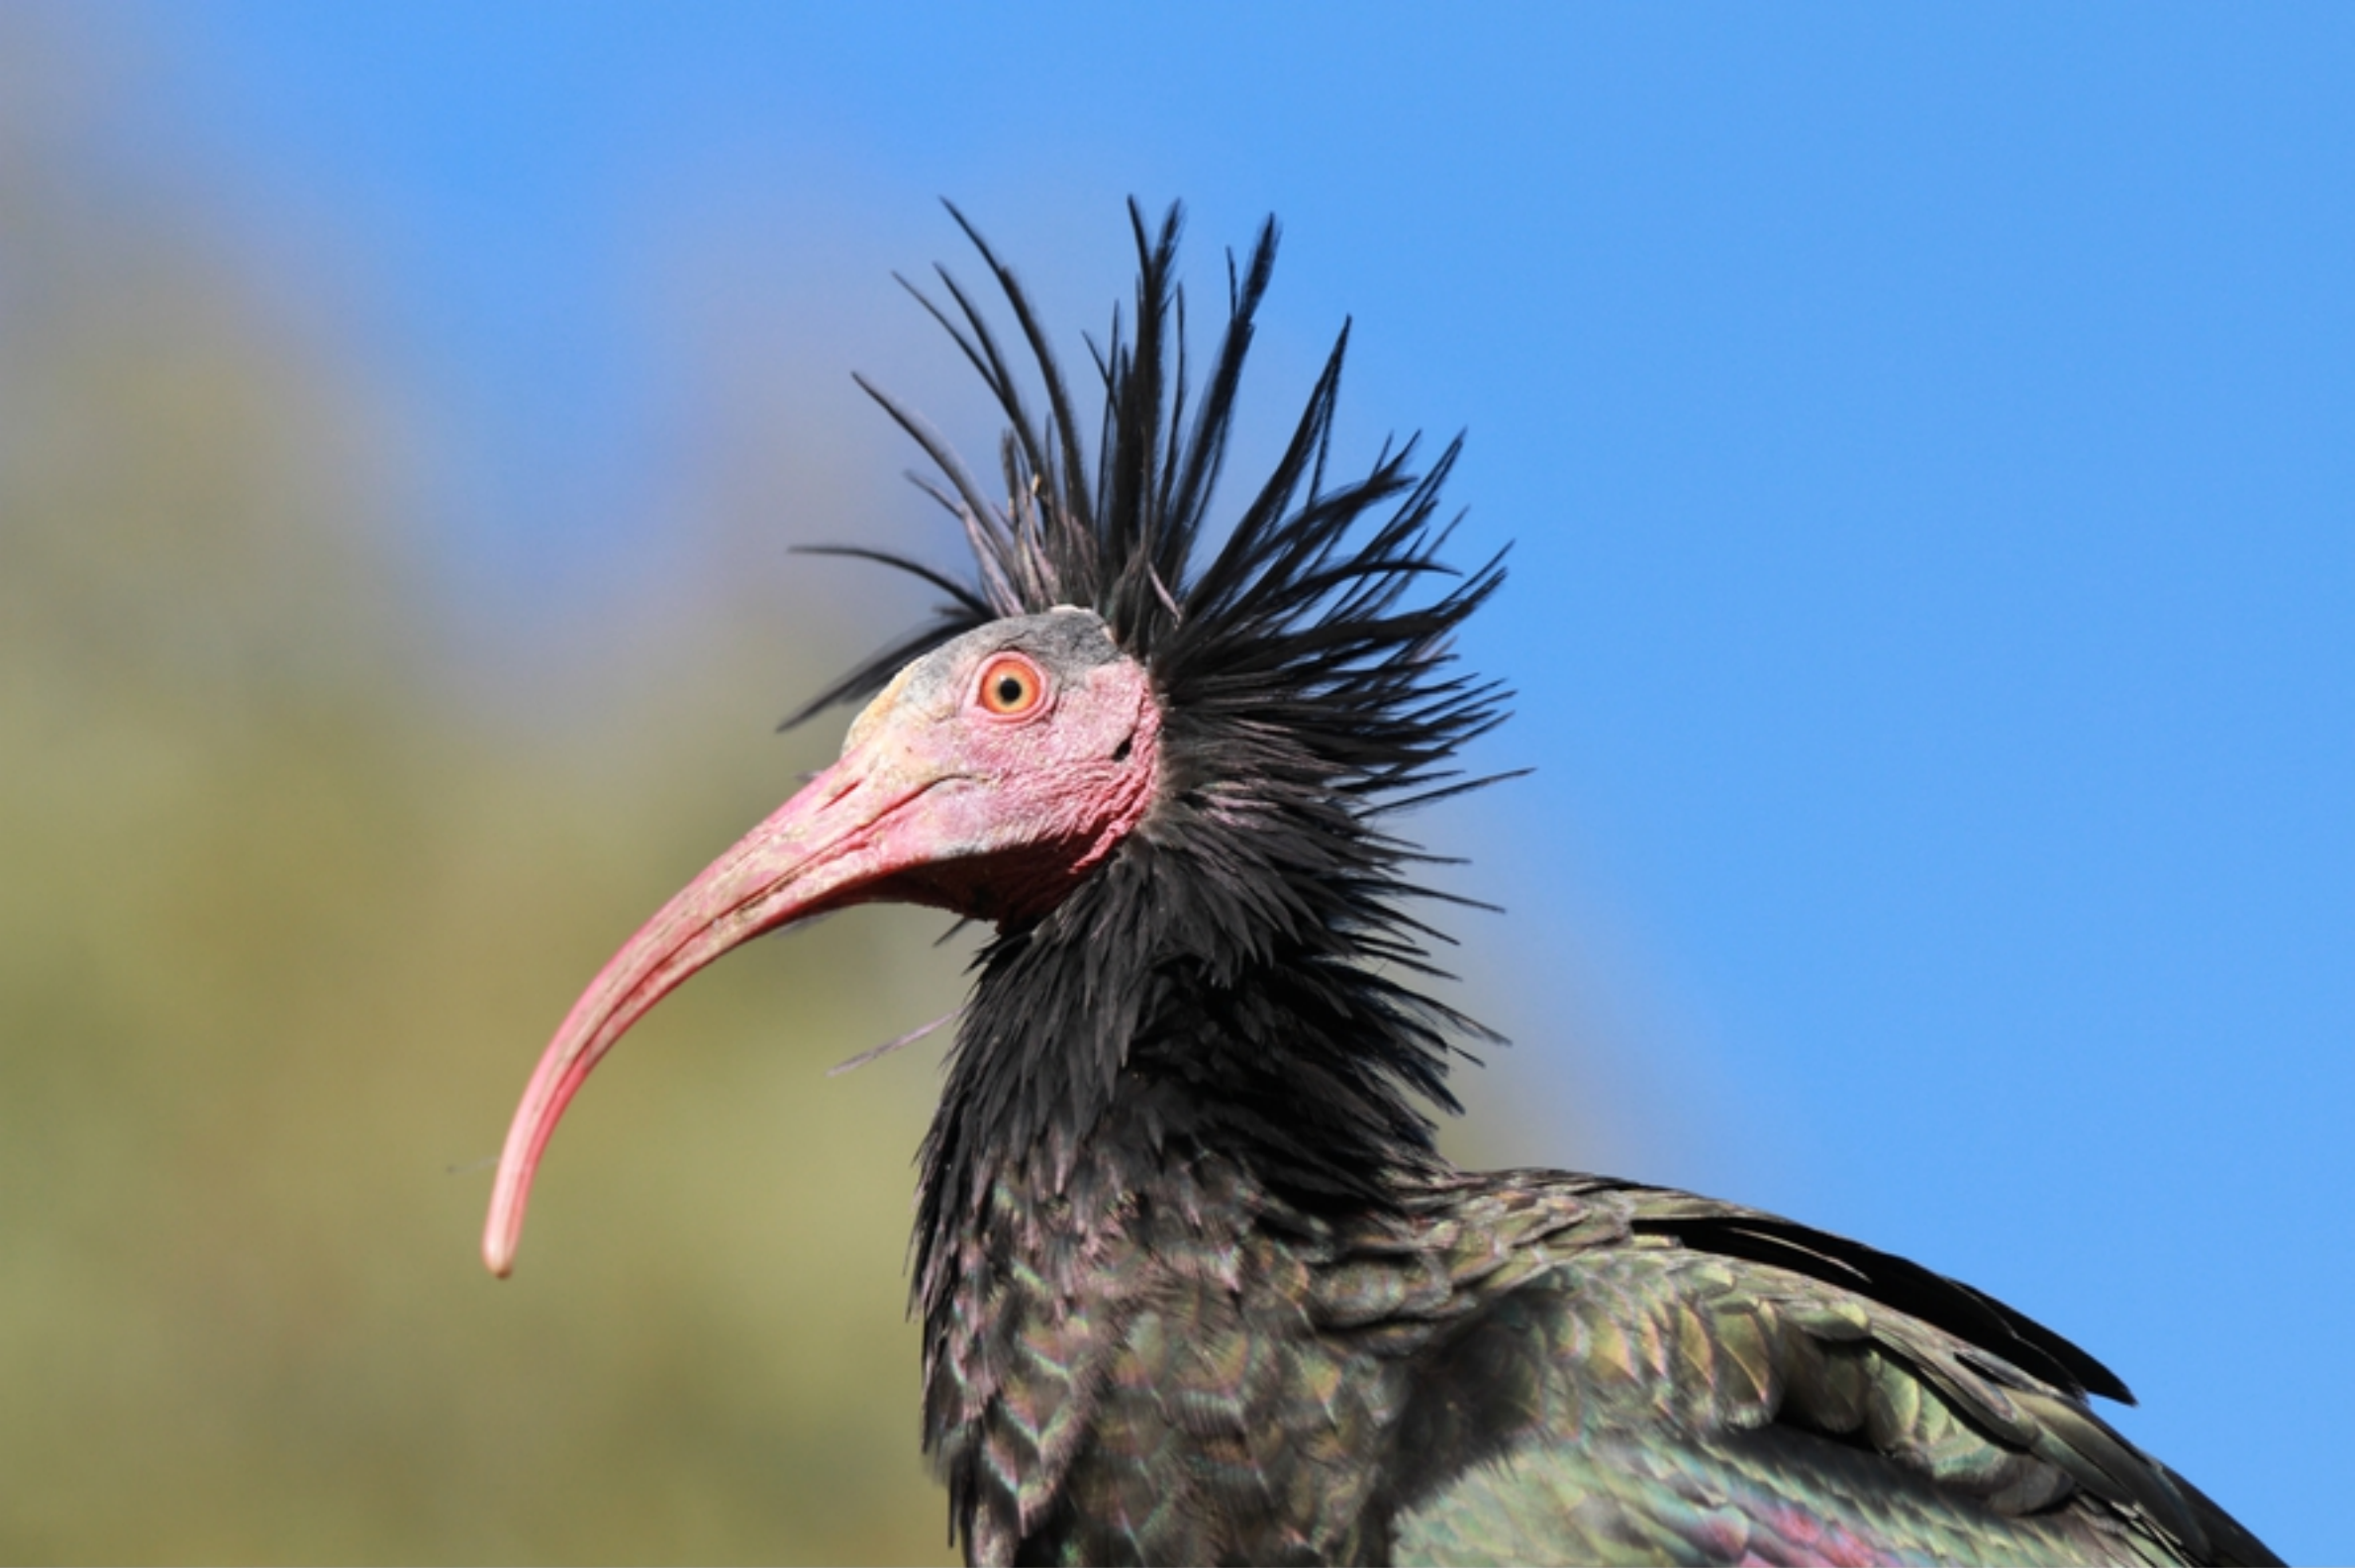

Figure 1

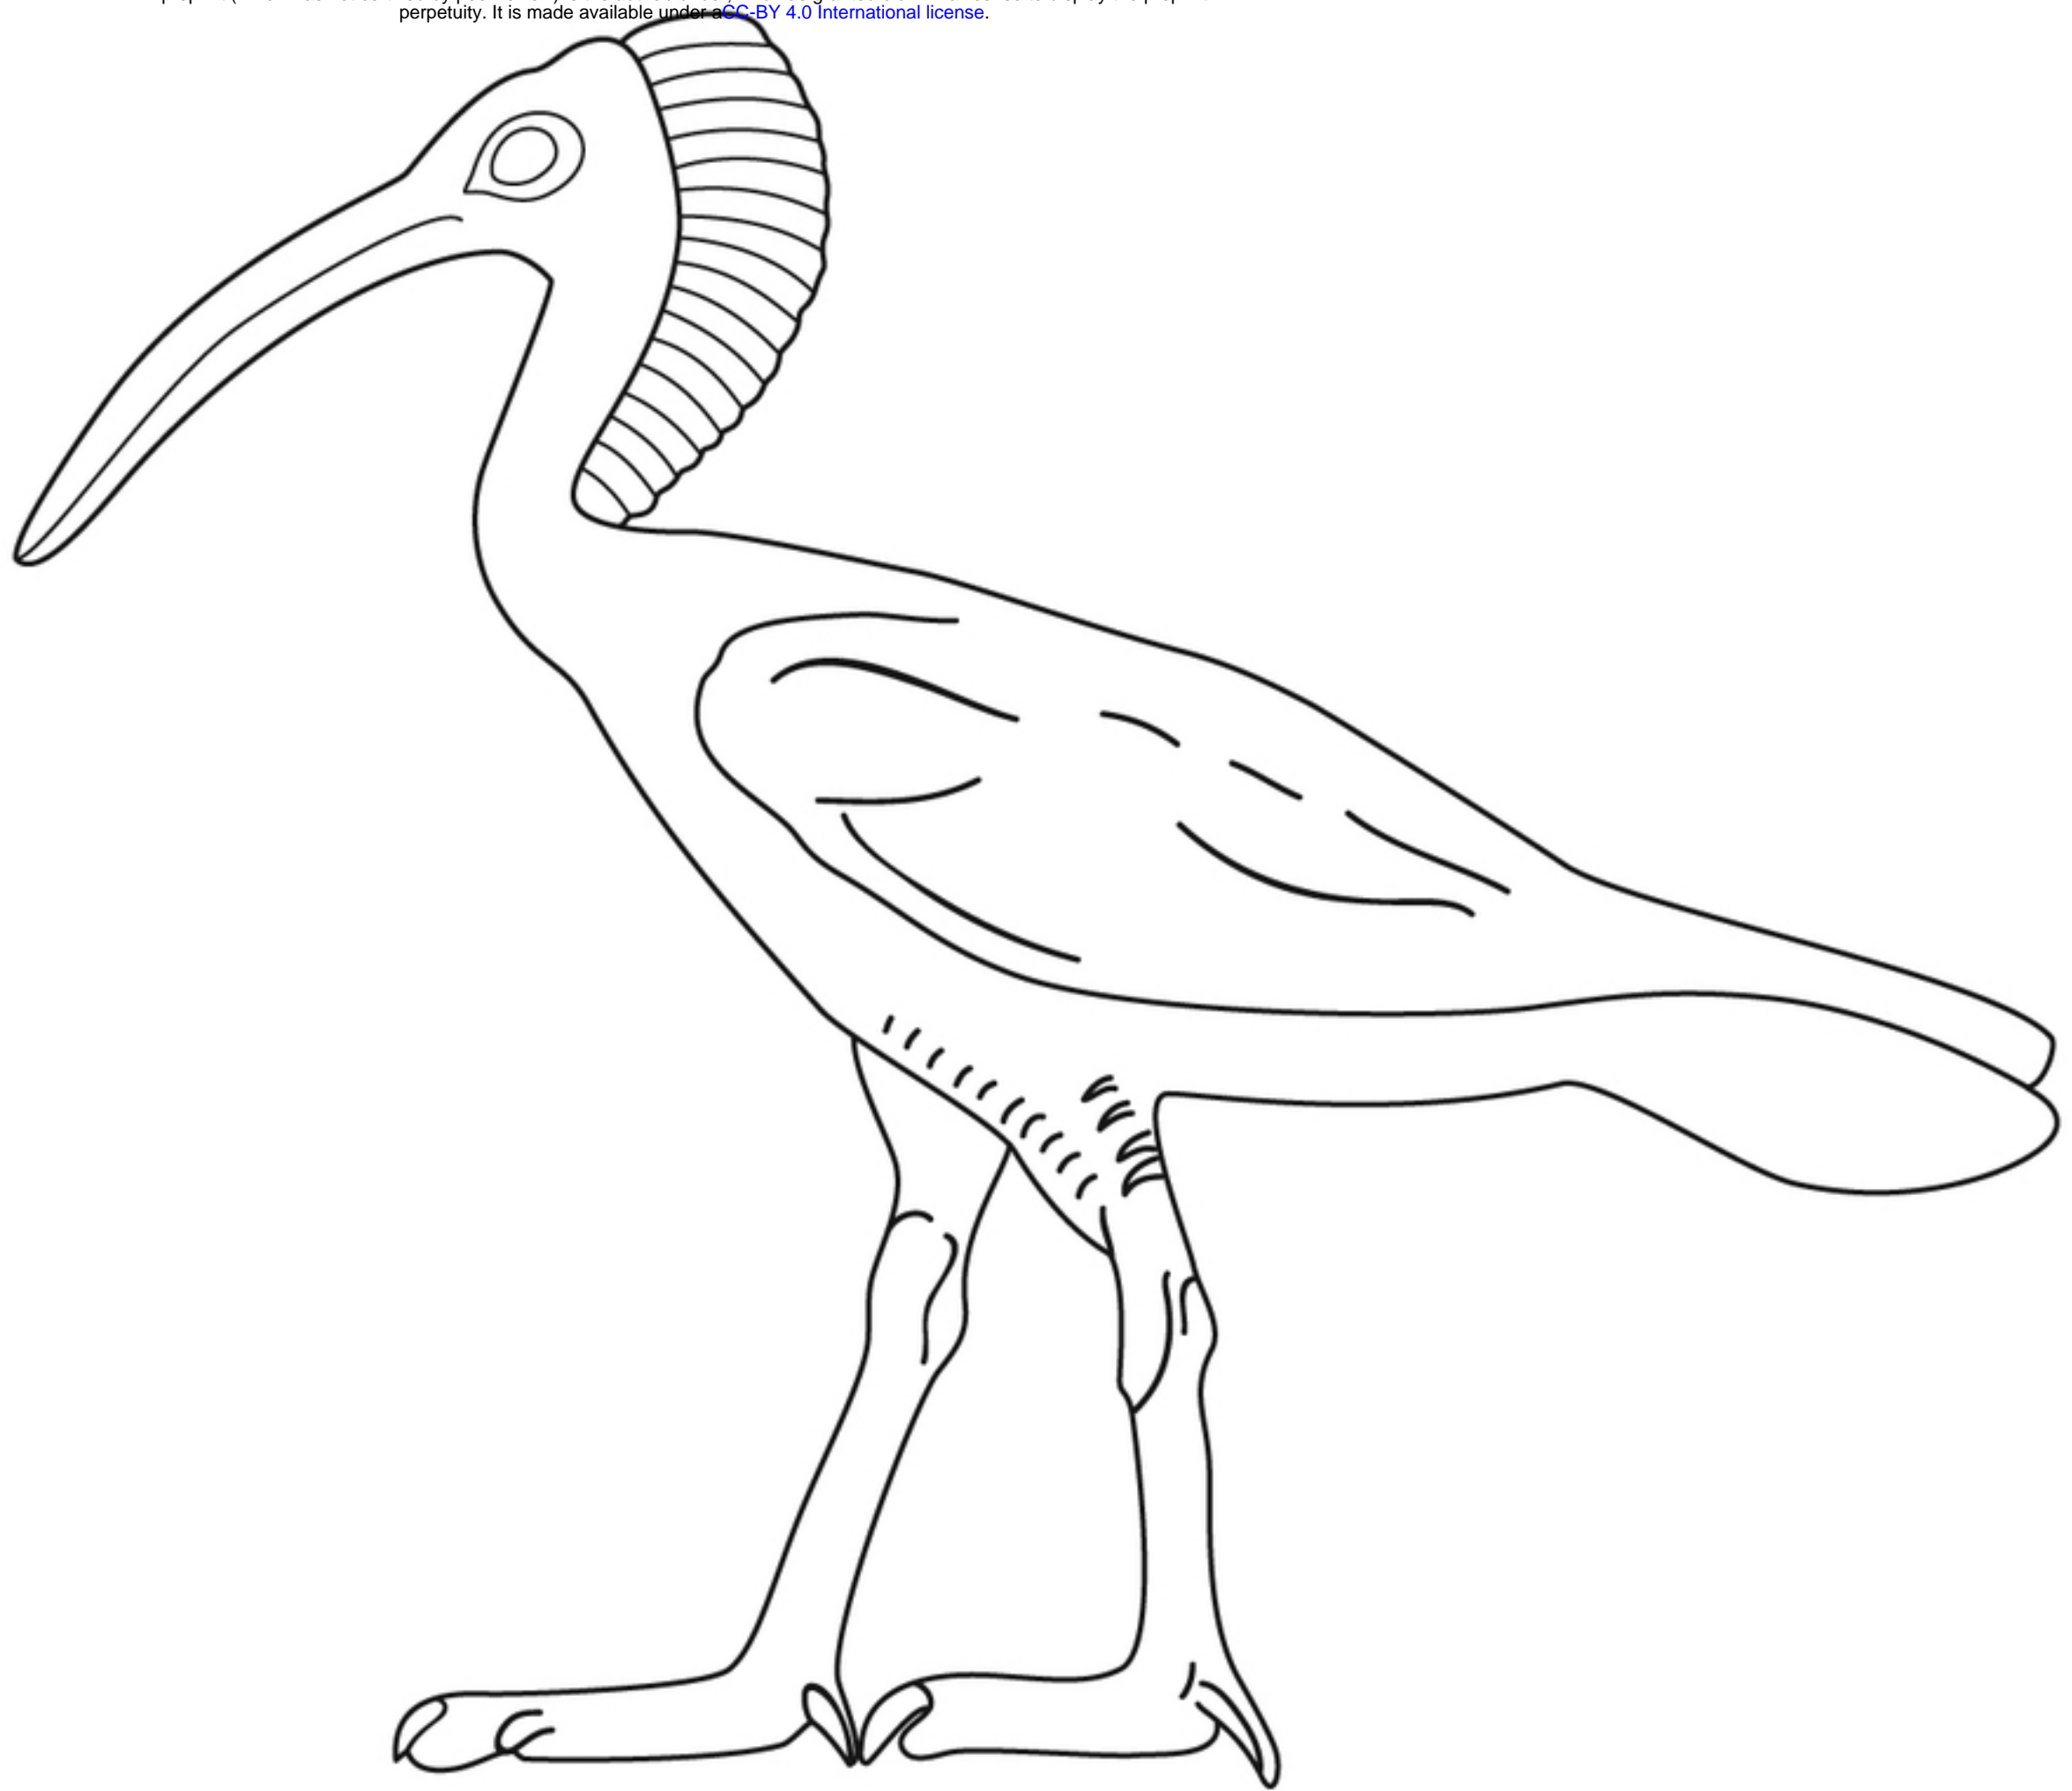

Figure 2

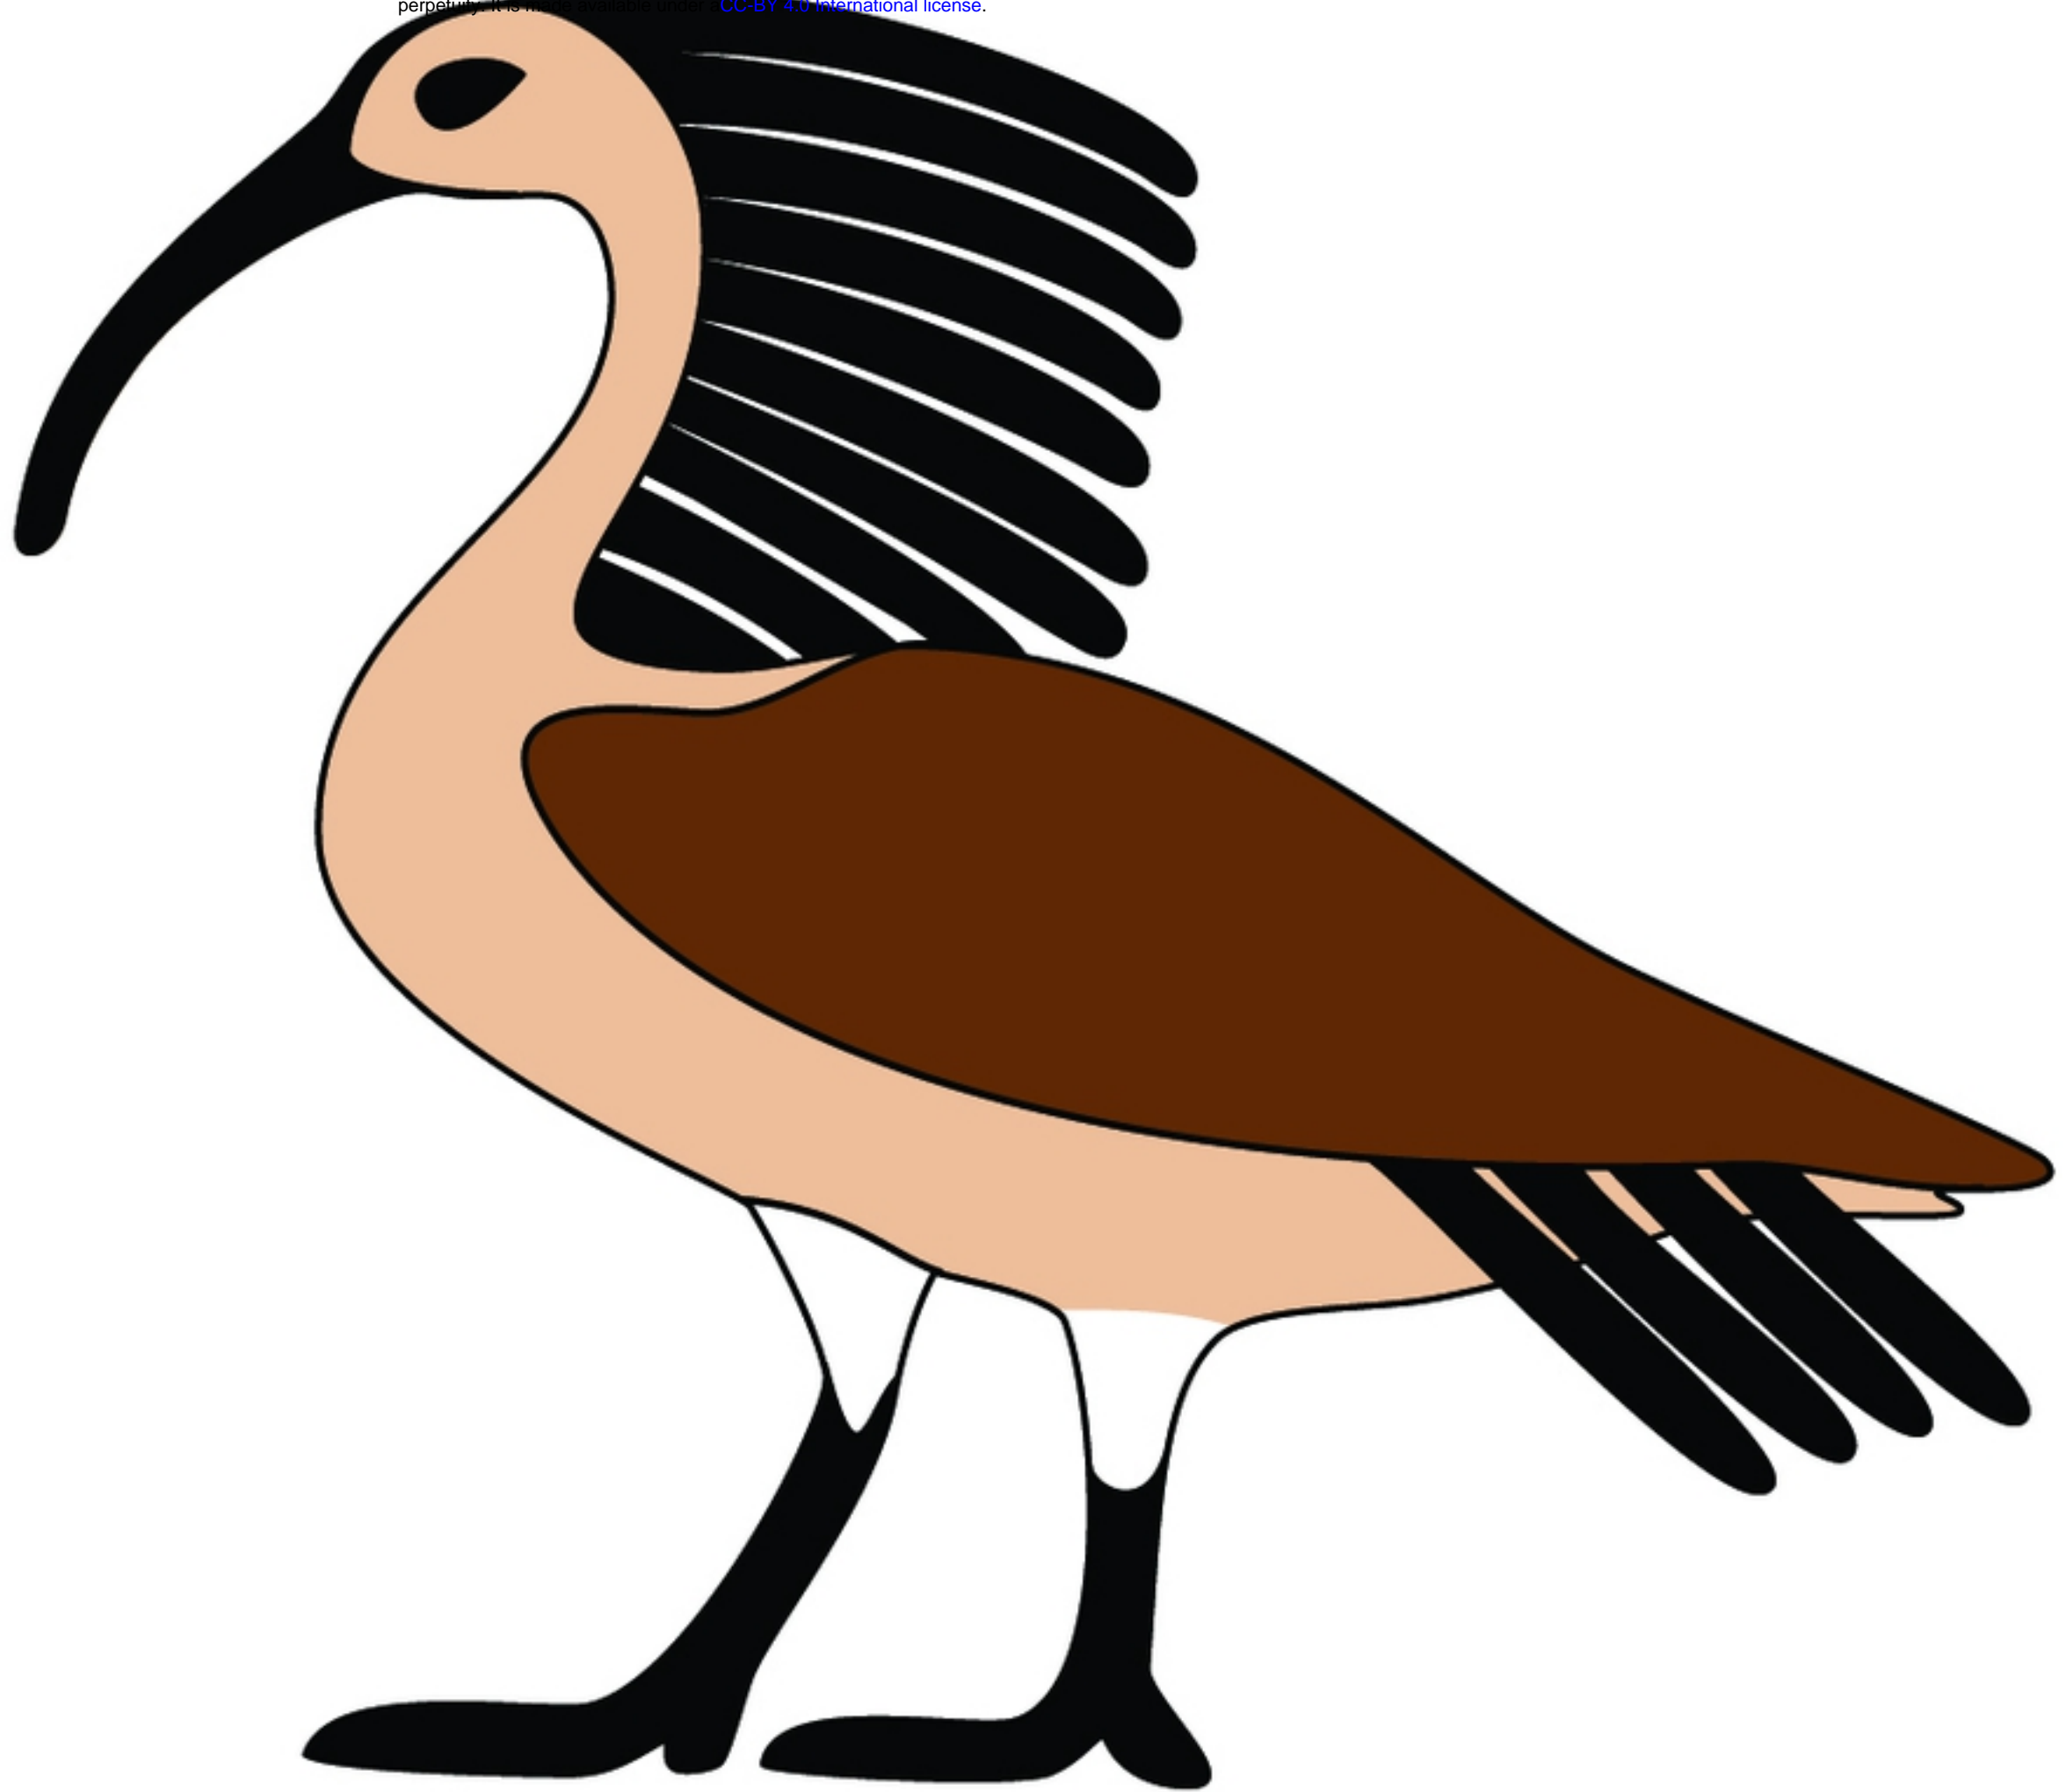

Figure 3

bioRxiv preprint doi: <https://doi.org/10.1101/2020.11.25.397576>; this version posted November 26, 2020. The copyright holder for this preprint (which was not certified by peer review) is the author/funder, who has granted bioRxiv a license to display the preprint in perpetuity. It is made available under aCC-BY 4.0 International license.

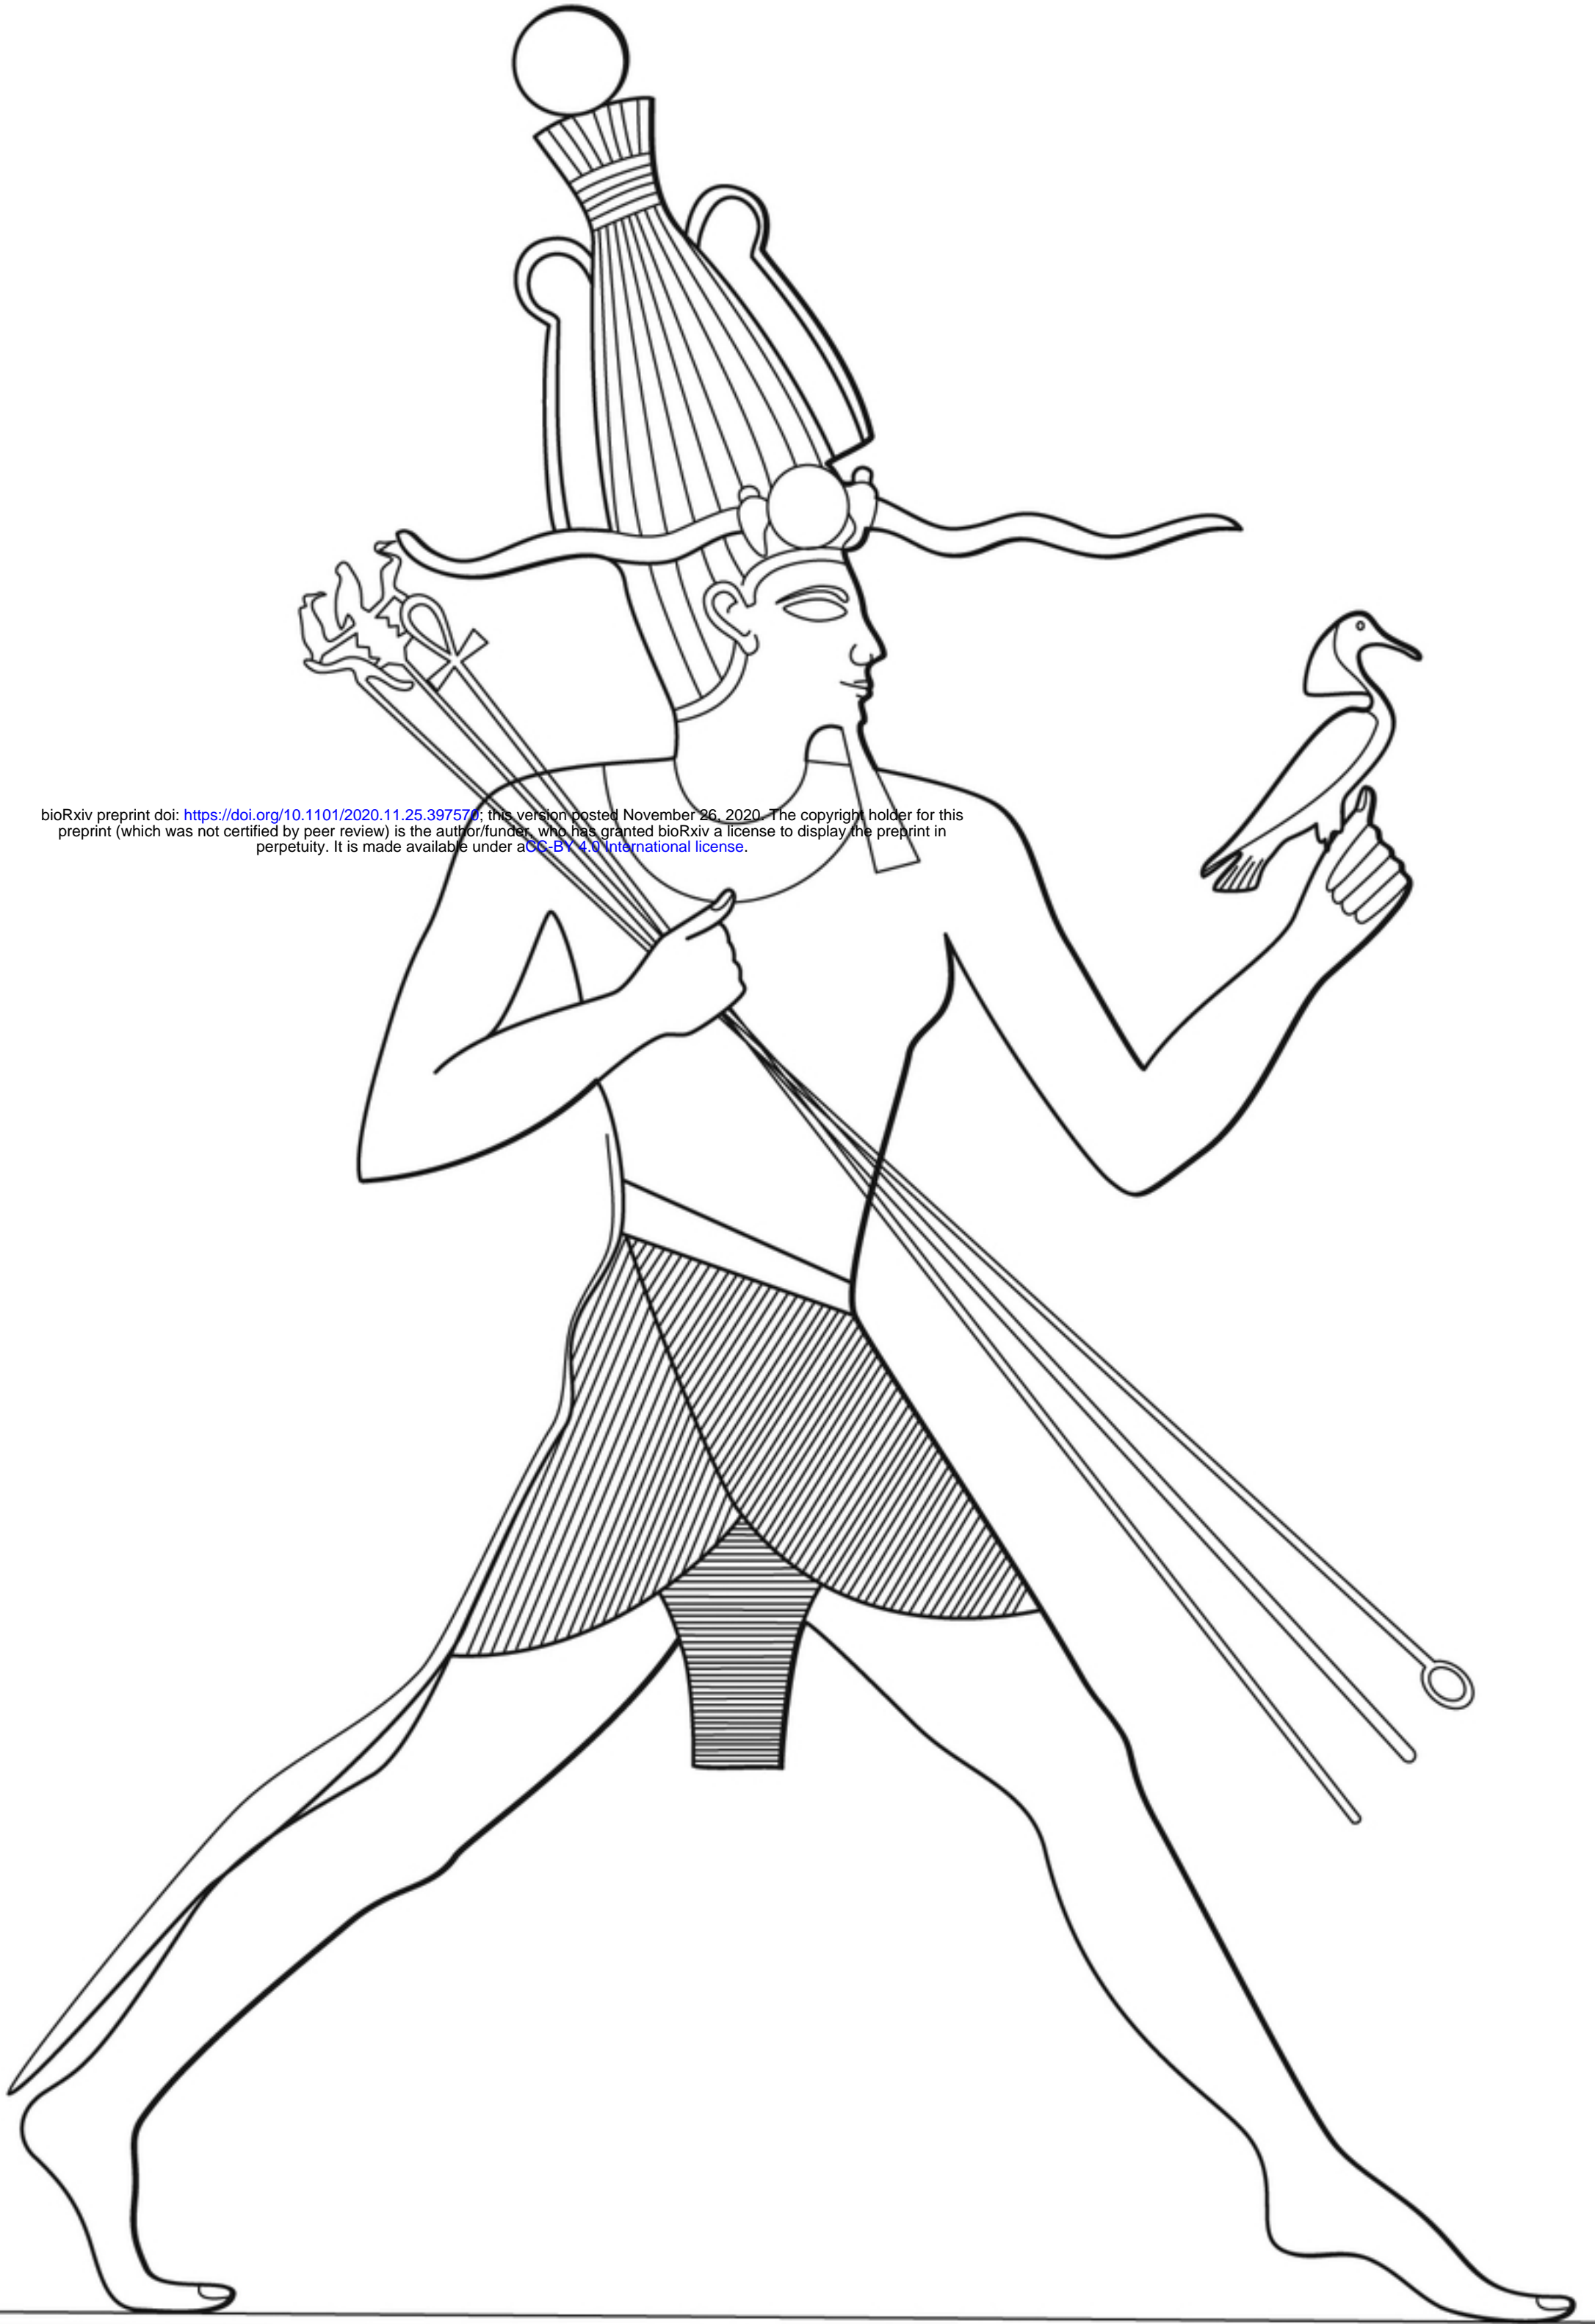

Figure 4

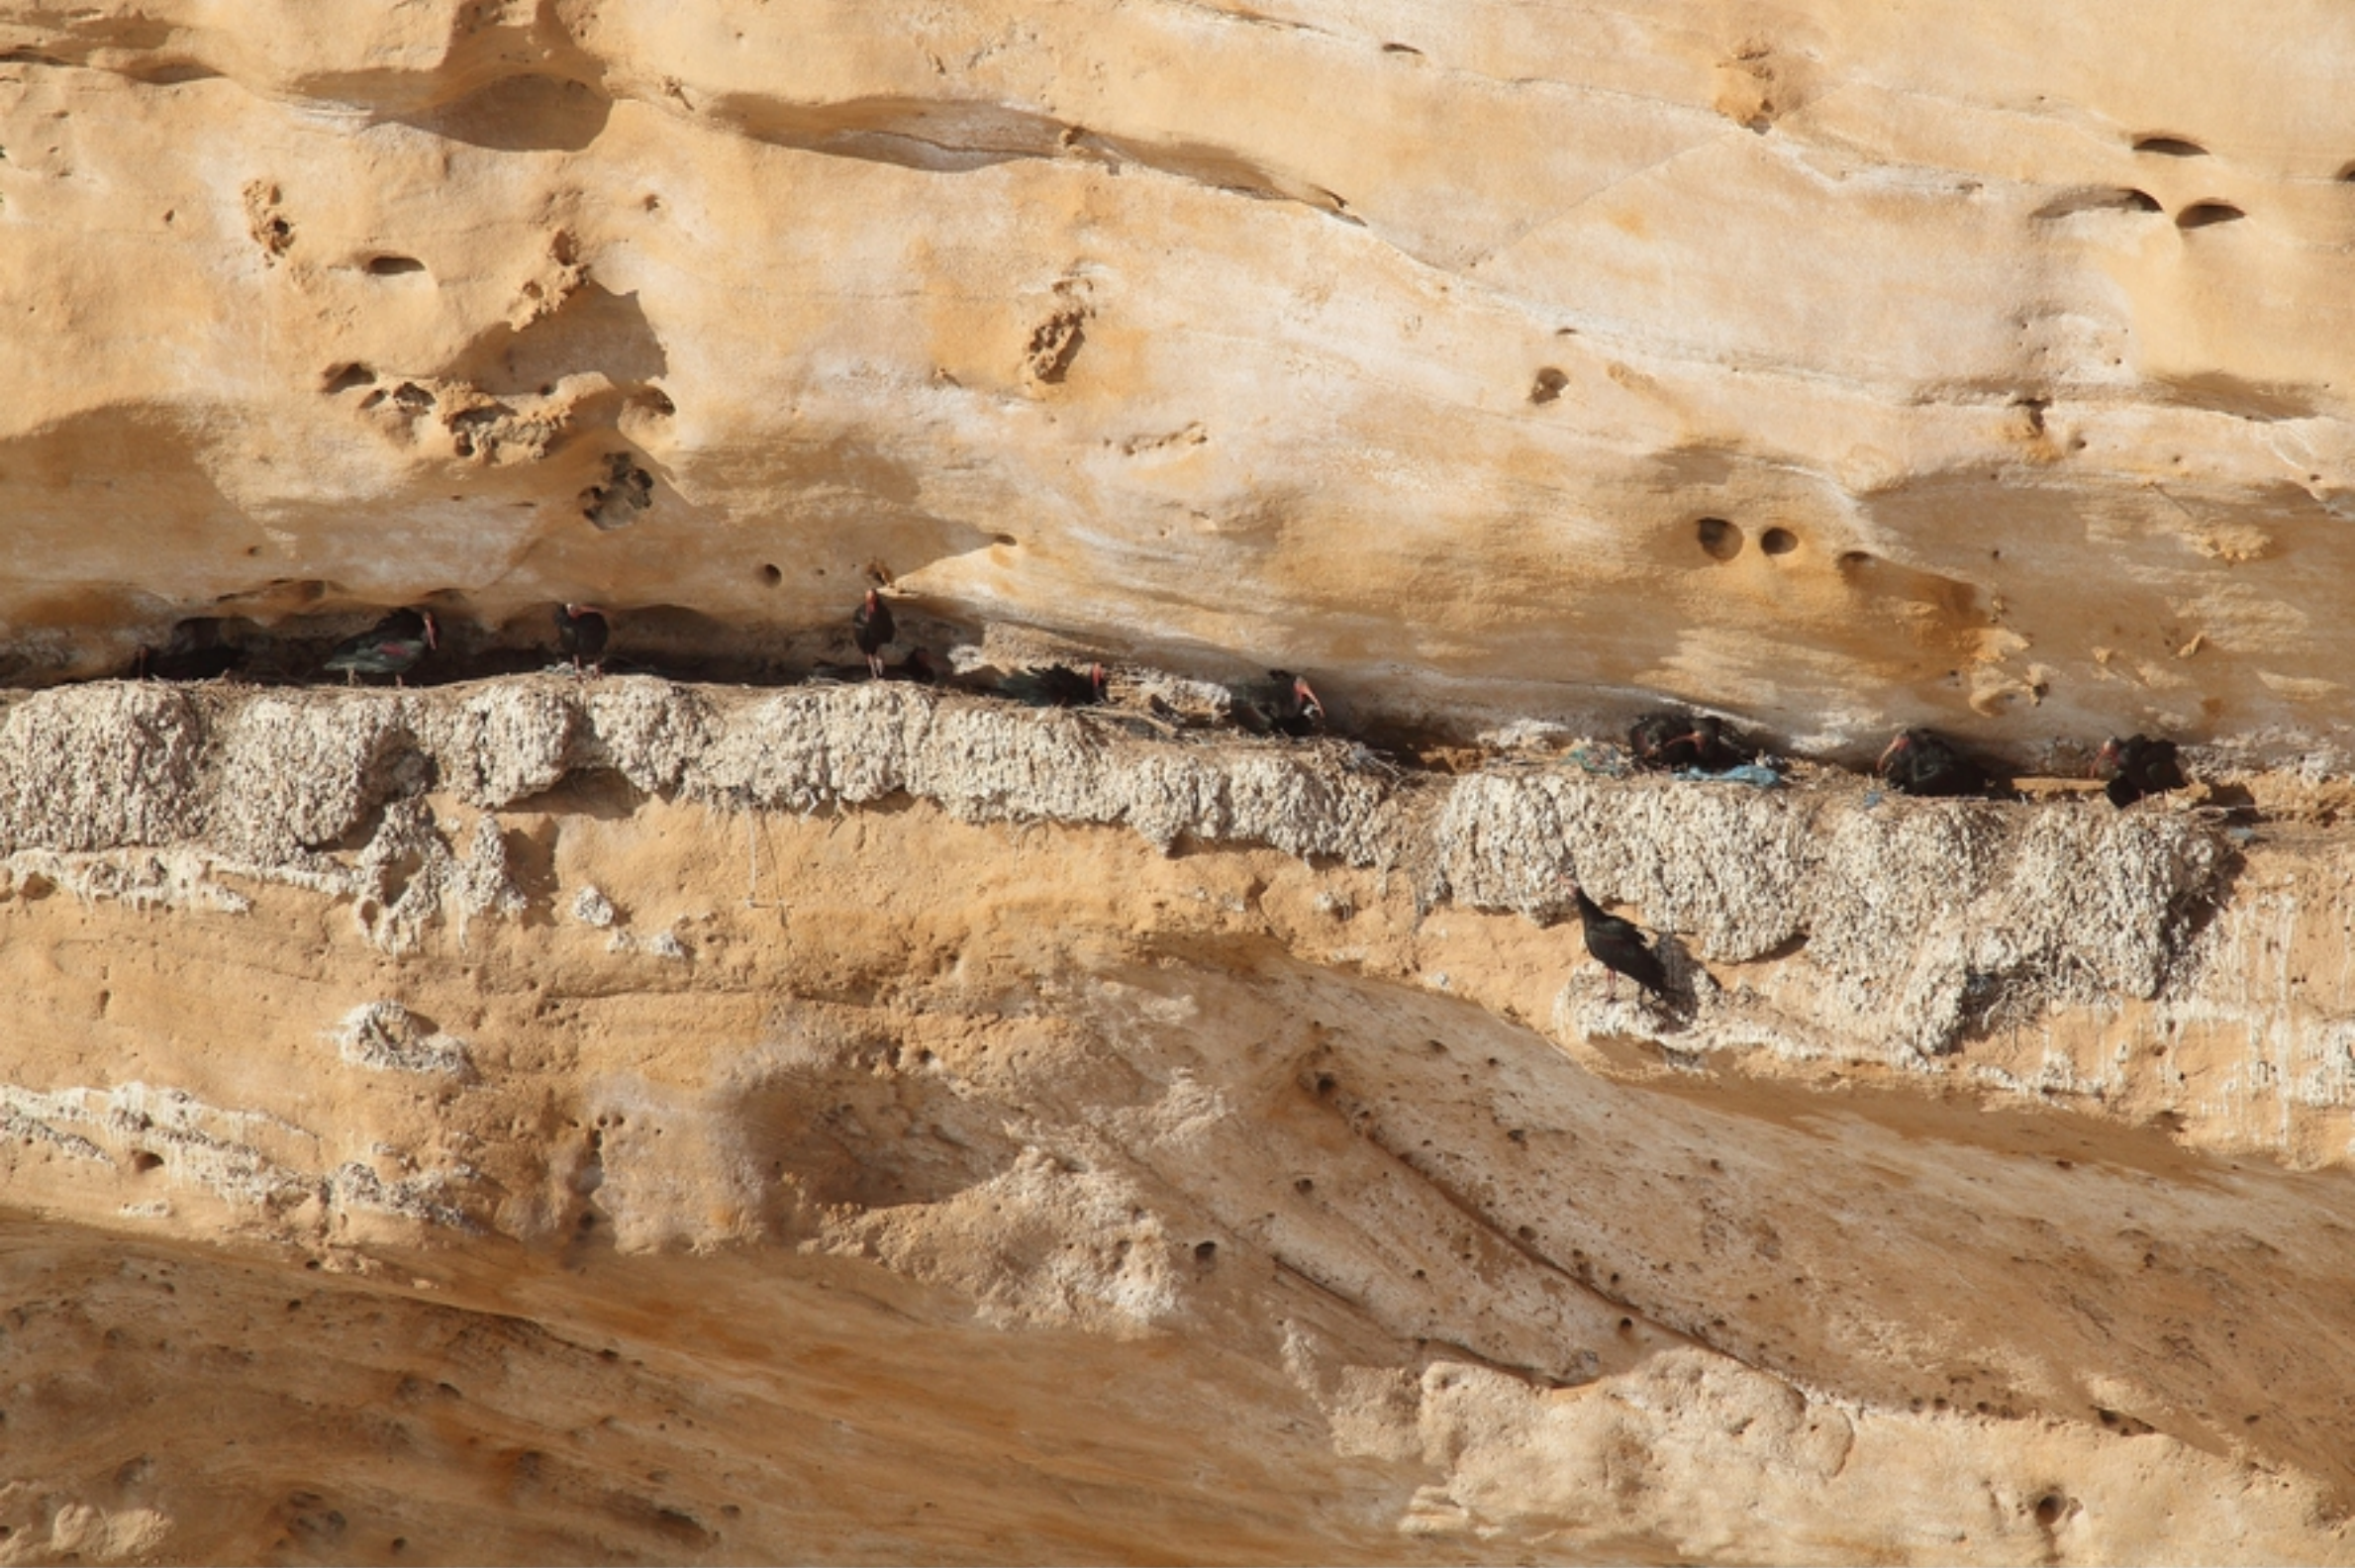

Figure 5

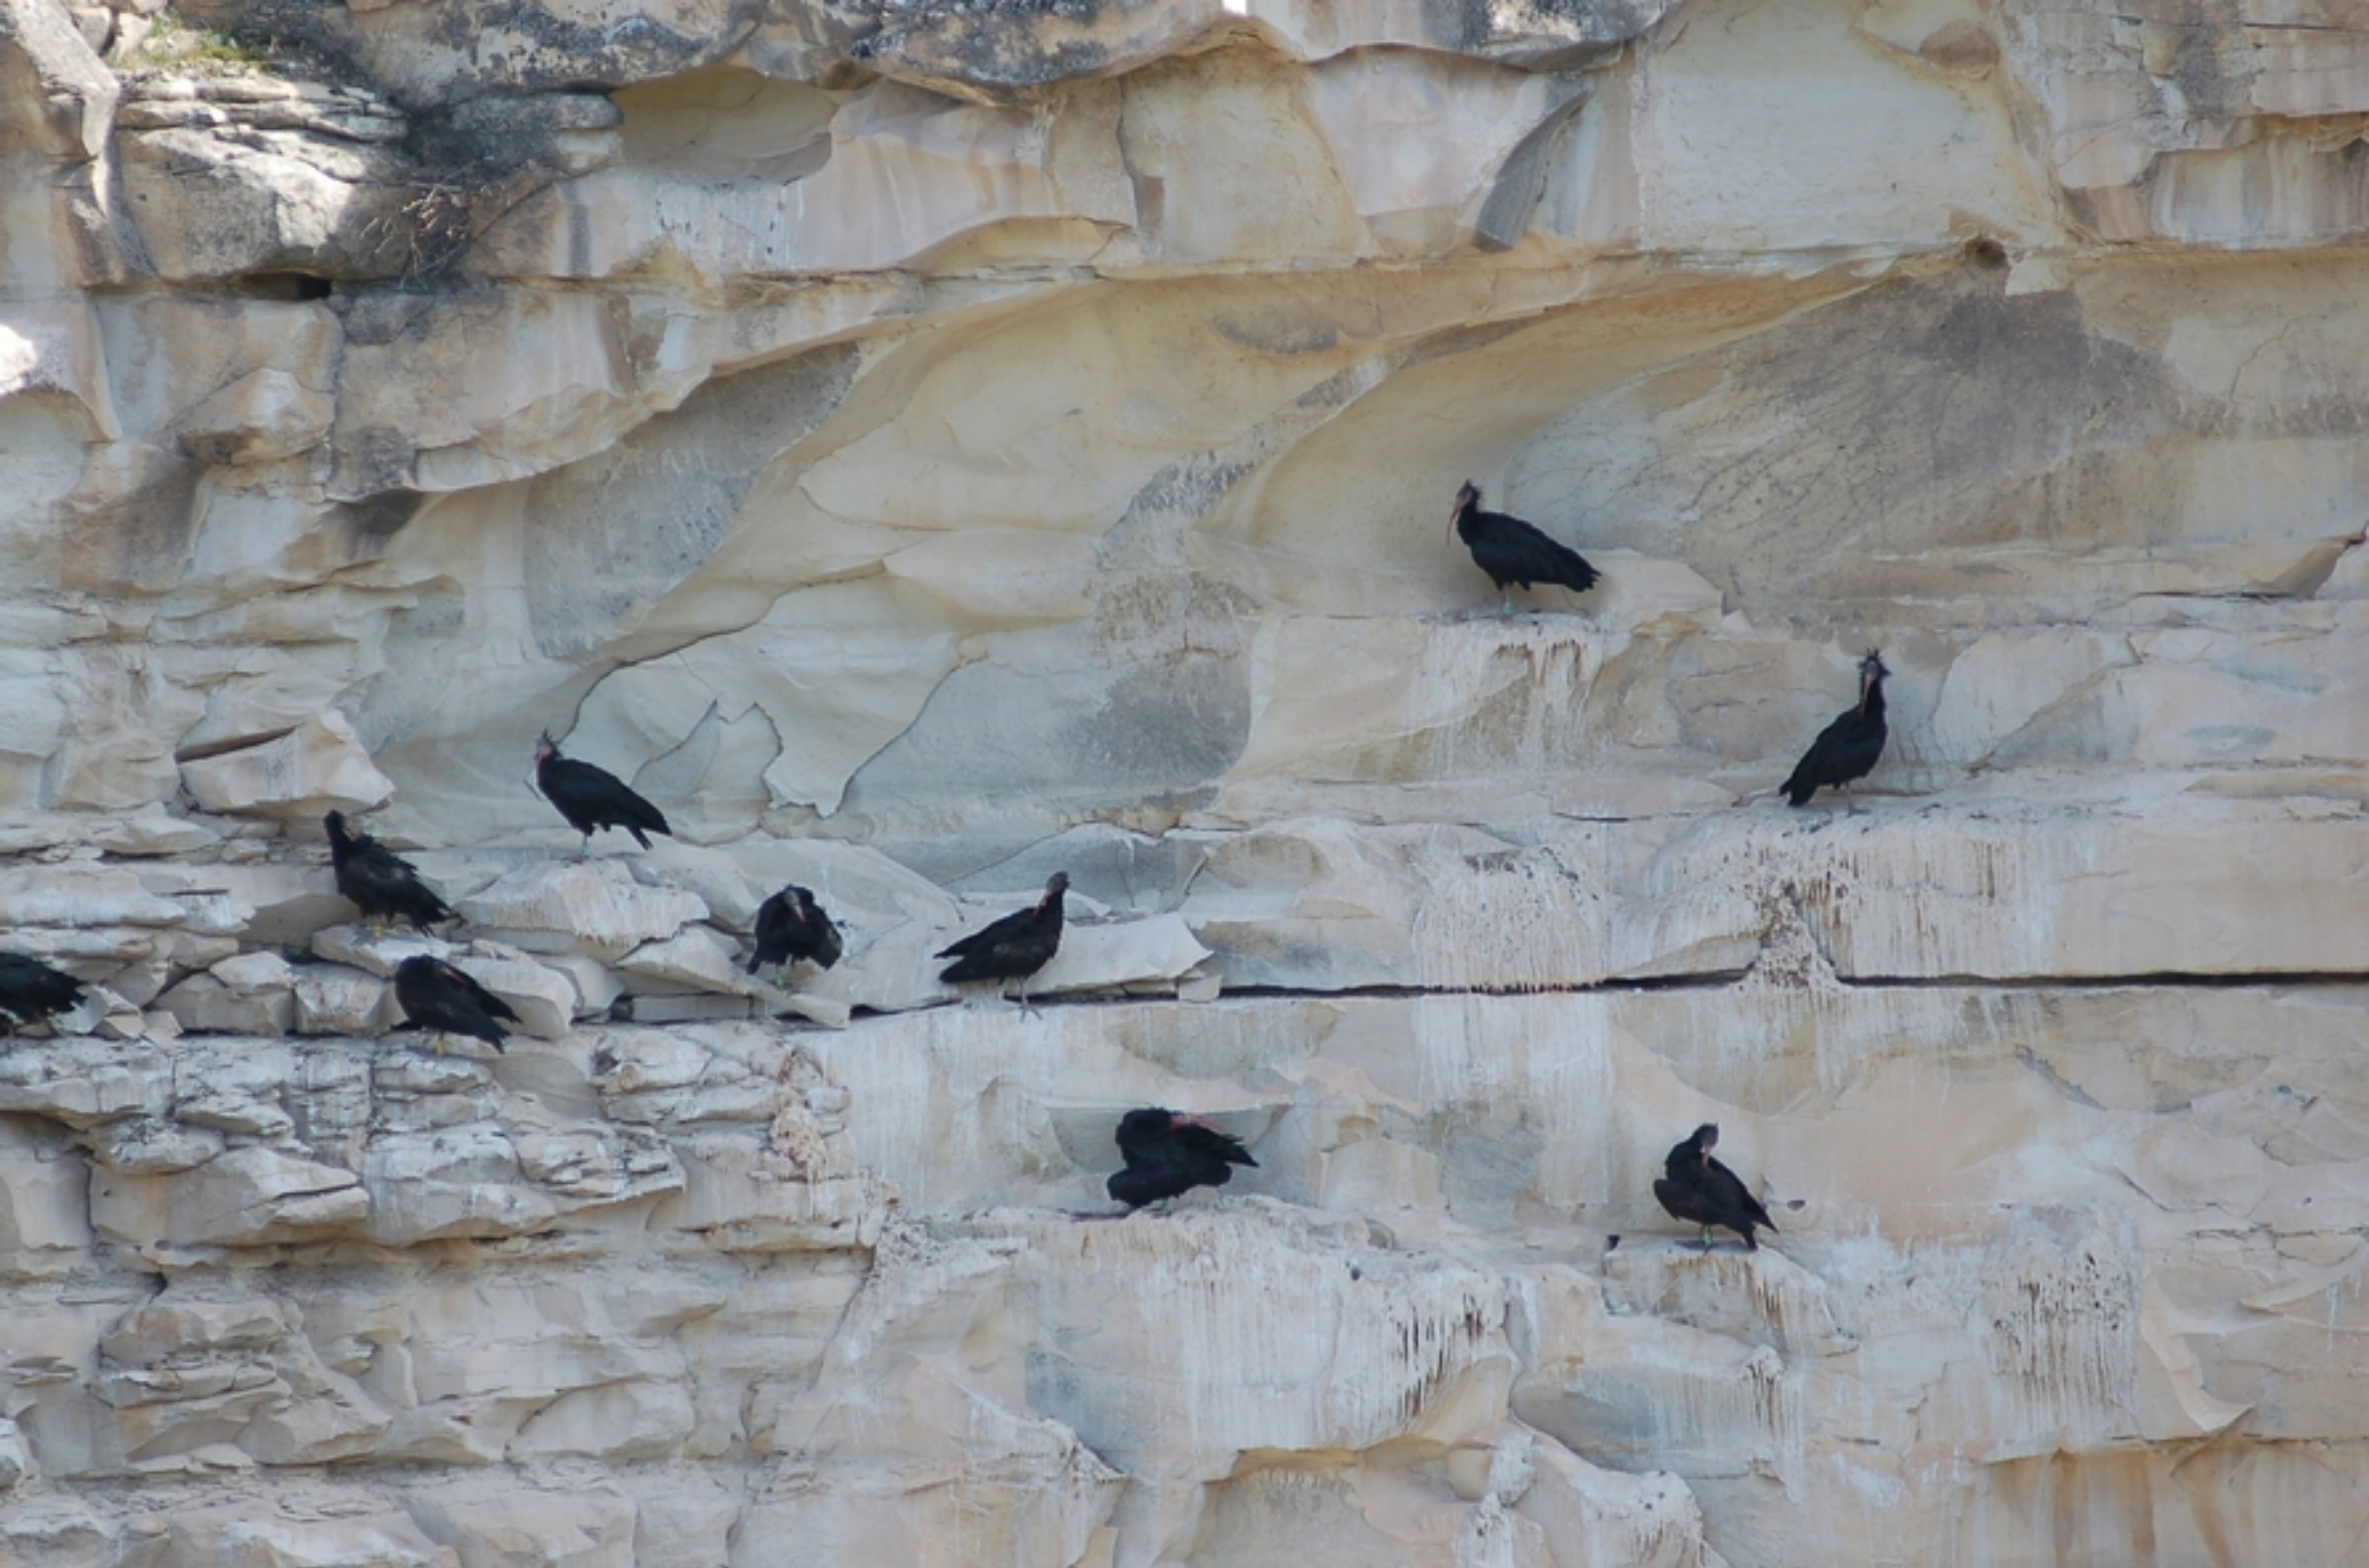

Figure 6



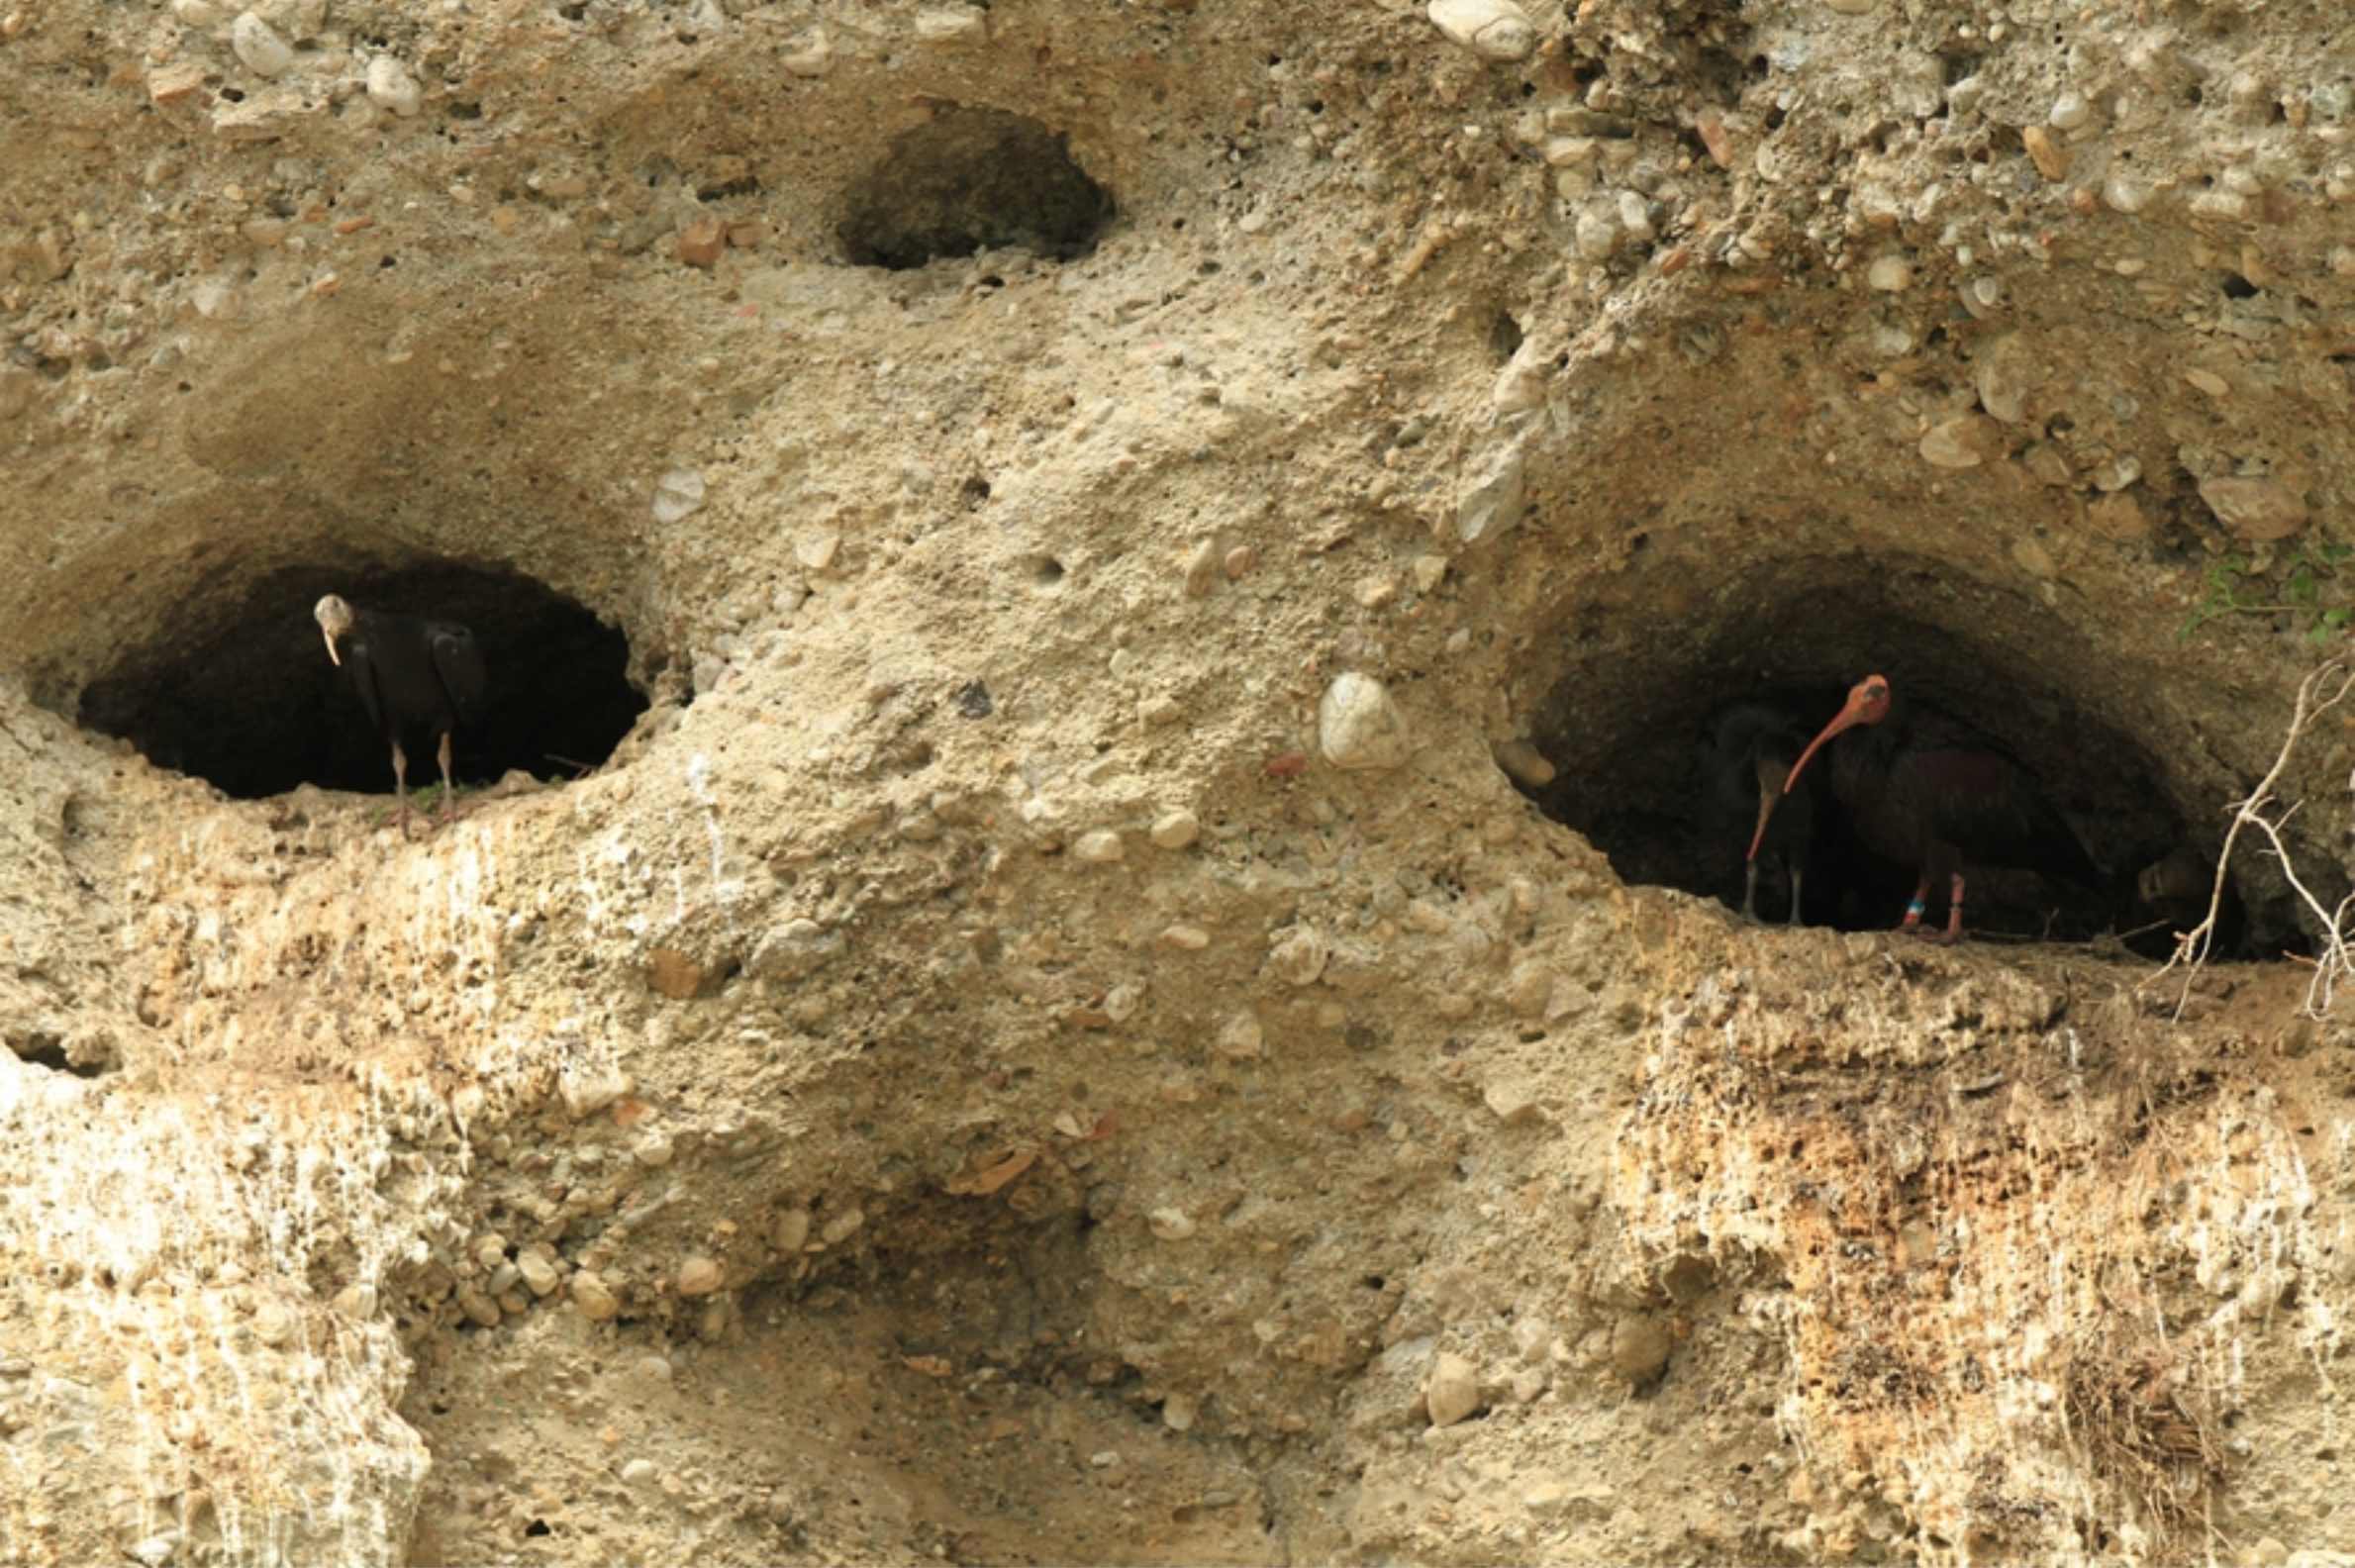

Figure 7

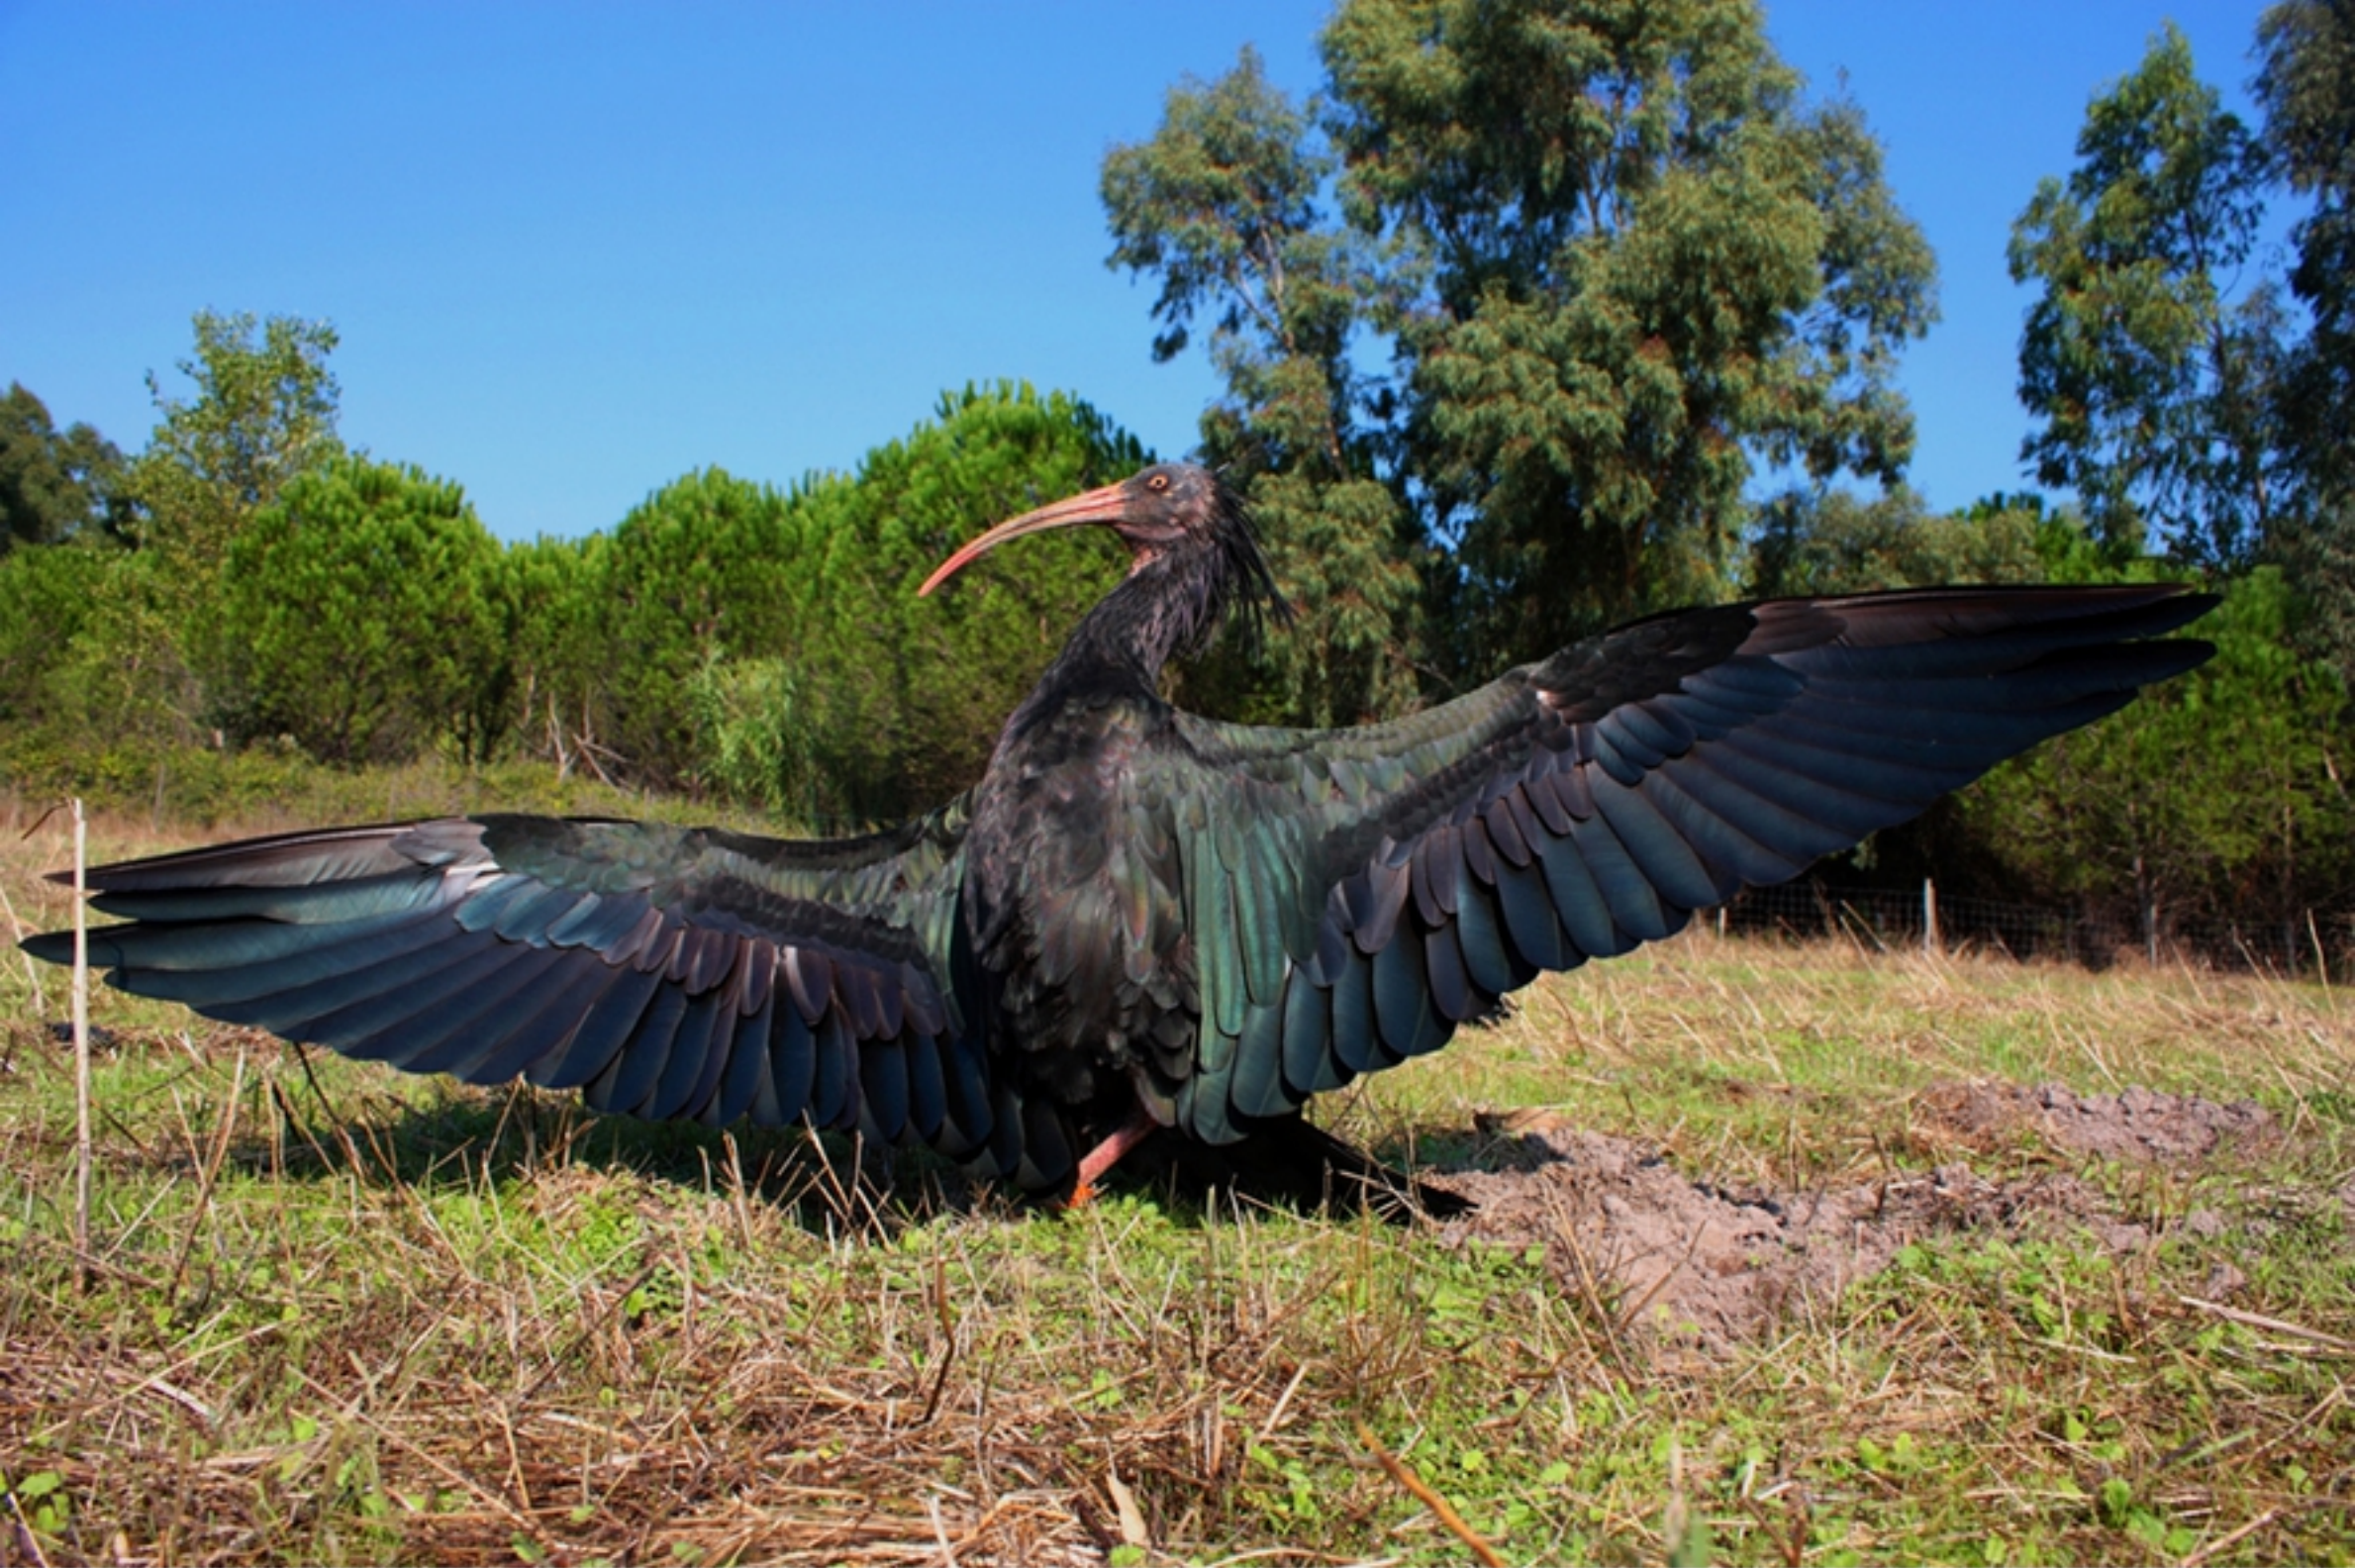

Figure 8

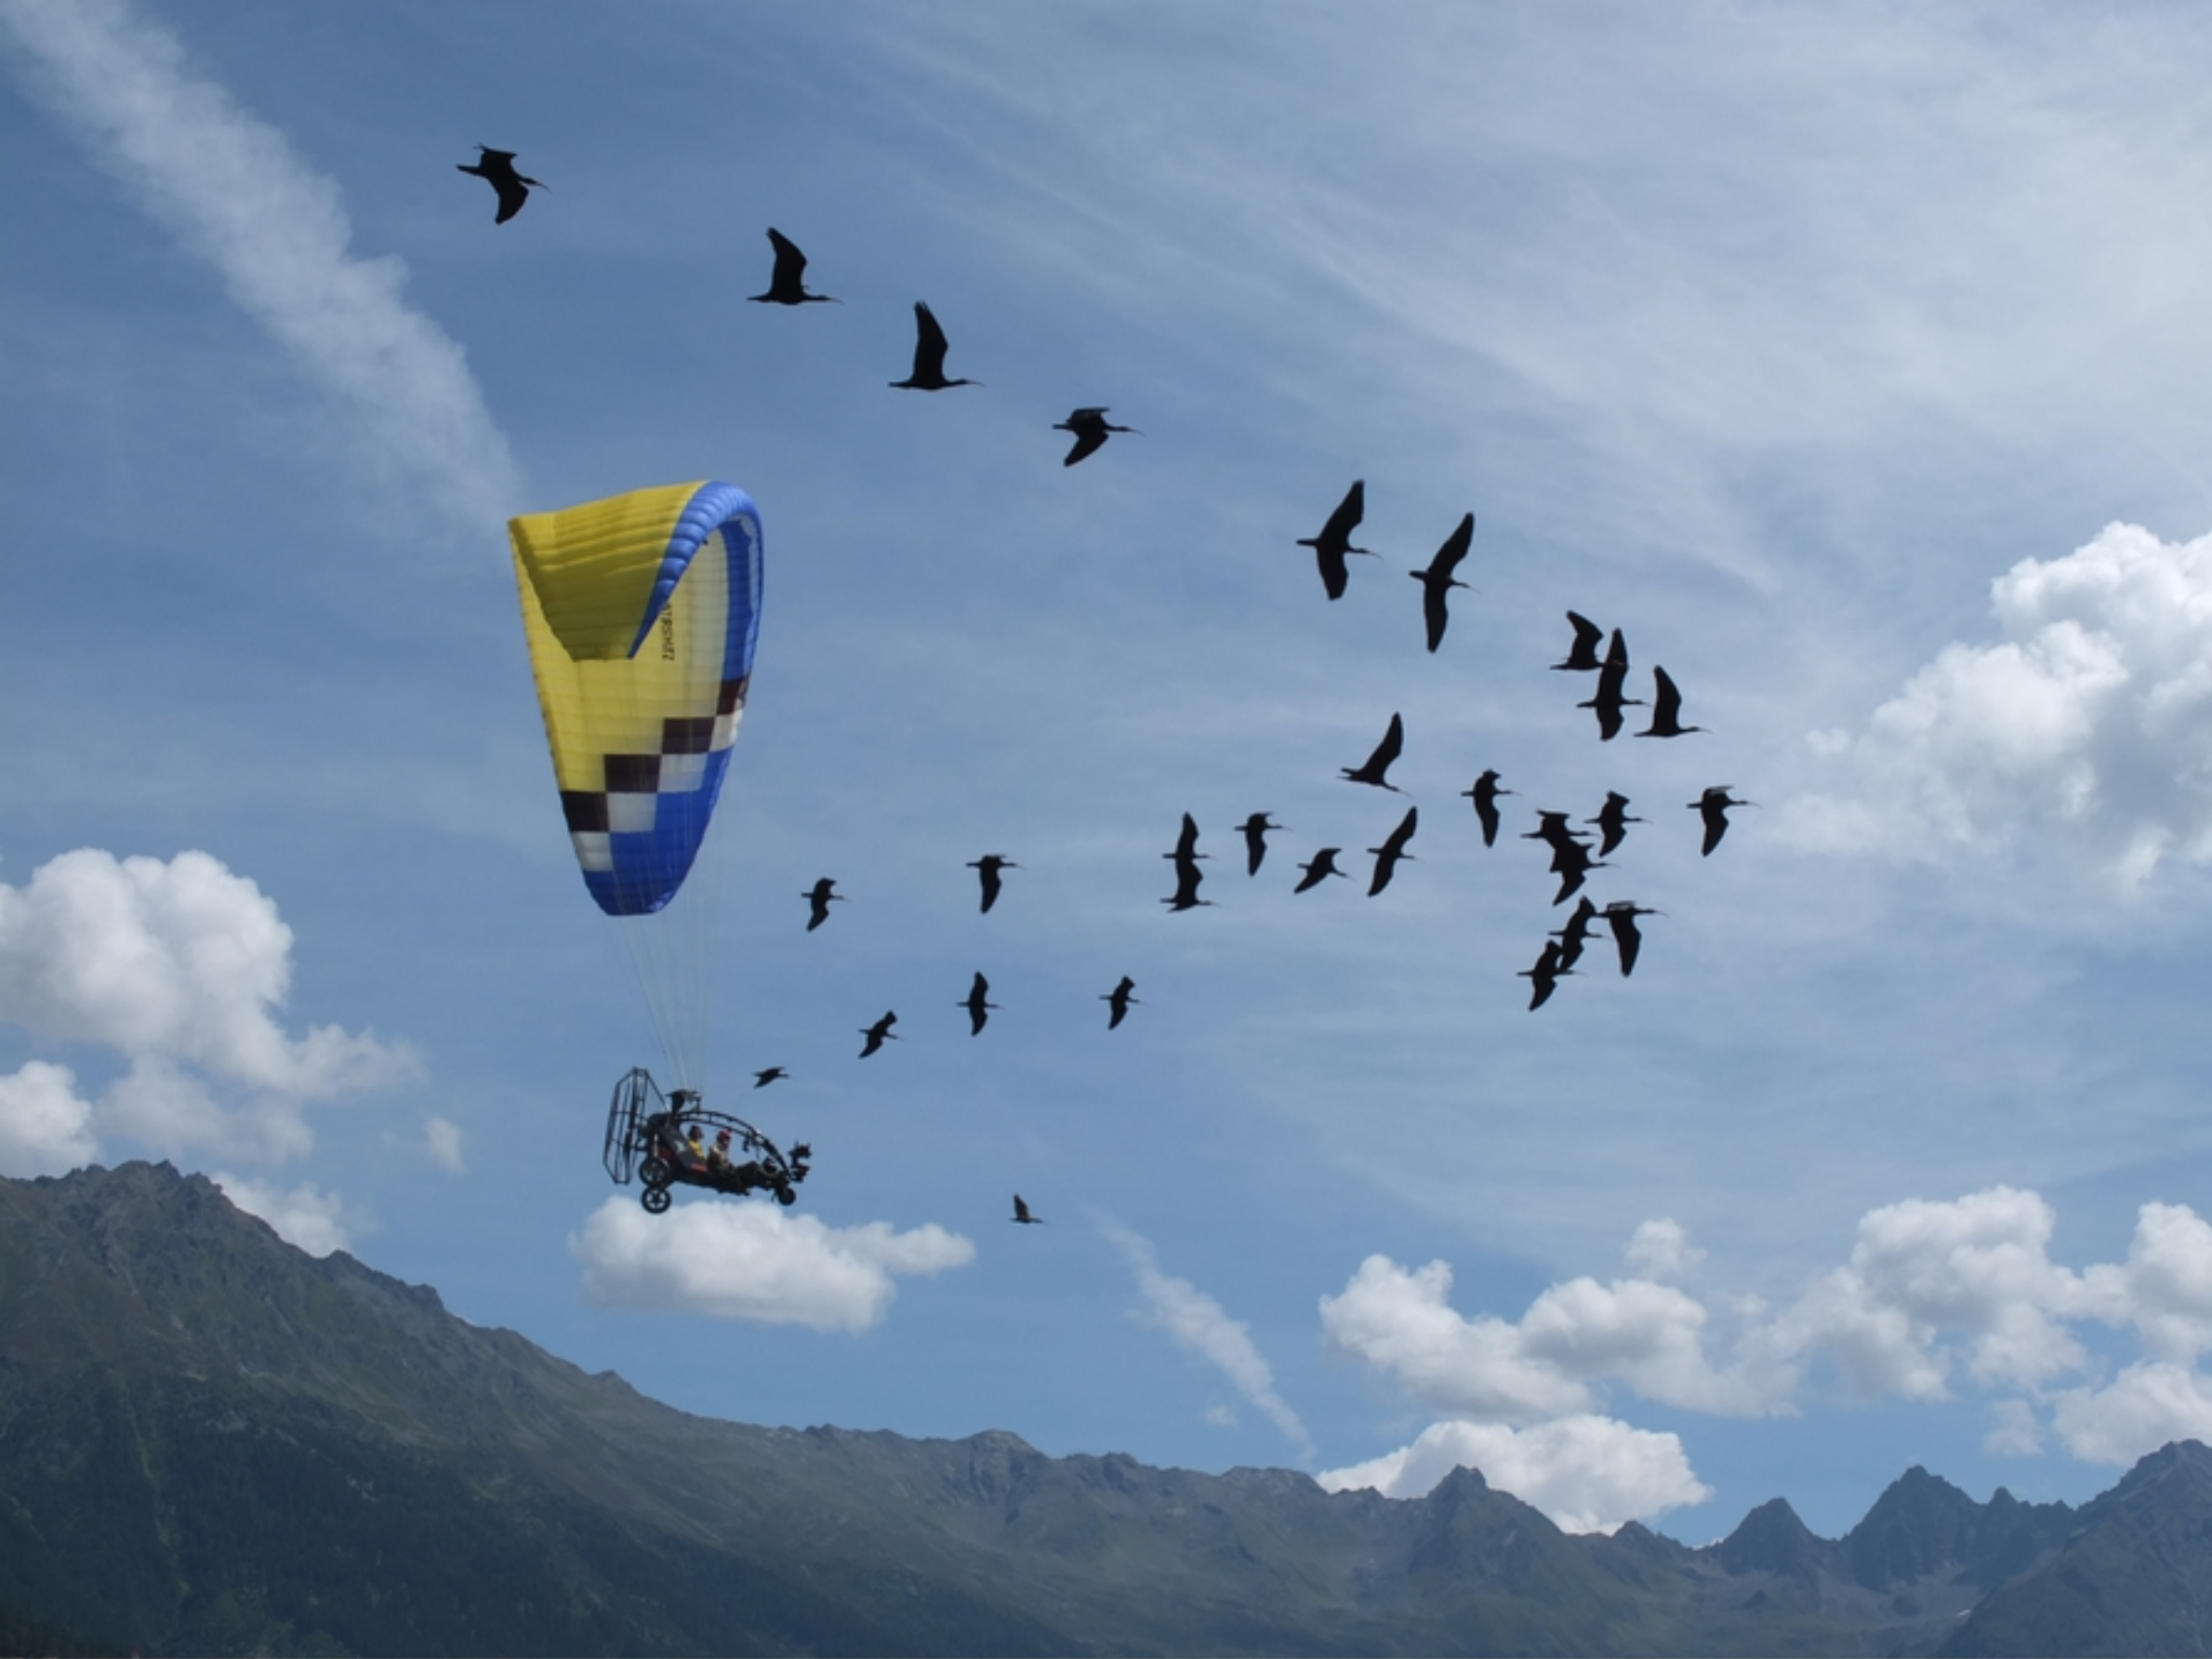

Figure 9
